# Supplementary material for: Fluorine containing amino acids: synthesis and peptide coupling of amino acids containing the all-cis tetrafluorocyclohexyl motif
Source: Royal Society of Chemistry journal article supplement (doi:10.1039/c5ob00650c), 2015-01-01
Supplement: c5ob00650c1.pdf [file c5ob00650c1.pdf]

## SUPPLEMENTARY INFORMATION

### Fluorine containing amino acids: Synthesis and peptide coupling of amino acids containing the all-*cis* tetrafluorocyclohexyl motif

Mohammed Salah Ayoup,<sup>†‡</sup> David B. Cordes,<sup>†</sup> Alexandra M. Z. Slawin,<sup>†</sup> and David O'Hagan<sup>†\*</sup>

<sup>†</sup>School of Chemistry, University of St Andrews, North Haugh, St Andrews, KY16 9ST, UK.

<sup>‡</sup>Department of Chemistry, Faculty of Science, P.B 426 Ibrahimia, Alexandria University, Egypt.

Corresponding author *e.mail* do1@st-andrews.ac.uk

EaSTChem School of Chemistry, University of St Andrews, North Haugh, St Andrews, KY16 9ST.

Email: [do1@st-andrews.ac.uk](mailto:do1@st-andrews.ac.uk)

#### Table of Content

|                                               |                |
|-----------------------------------------------|----------------|
| <b>1- General Experimental Notes.....</b>     | <b>S1</b>      |
| <b>2- Procedure and analytical data .....</b> | <b>S2-S21</b>  |
| <b>3- NMR Spectra and Mass Spectra.....</b>   | <b>S23-S54</b> |

## 1. General Experimental

All reactions were carried out in oven-dried glassware under an argon atmosphere using a double vacuum manifold with the inert gas passing through a bed of silica gel and molecular sieves. Petrol refers to the petroleum ether fraction with a boiling point between 40-60 °C. All chemicals were used as supplied. All NMR spectra were recorded using a Bruker Avance III 500, Bruker Avance II 400, Bruker Avance 300 or 500 spectrometers. The deuterated solvent was used for an internal deuterium lock.  $^1\text{H}$  NMR spectra were recorded at either 300, 400 or 500 MHz.  $^{13}\text{C}$  NMR spectra were recorded using UDEFT pulse sequence and broadband proton decoupling at either 75, 100 or 126 MHz.  $^{19}\text{F}$  NMR spectra were recorded at 282, 376 or 470 MHz. All chemical shifts,  $\delta$ , are stated in units of parts per million (ppm), relative to a standard, for  $^1\text{H}$  NMR and  $^{13}\text{C}$  NMR the reference point is TMS ( $\delta_{\text{H}}$  and  $\delta_{\text{C}}$ : 0.00 ppm). For  $^{19}\text{F}$  NMR the reference point is  $\text{CCl}_3\text{F}$  ( $\delta_{\text{F}}$ : 0.00 ppm). Melting points were determined using a Griffin MPA350 or a Electrothermal 9100 melting point apparatus and are uncorrected. High and low resolution mass spectra were obtained by atmospheric pressure chemical ionisation (APCI), electrospray ionization (ESI) and electron ionization (EI). ESI-MS spectra were recorded on a Waters Micromass LCT spectrometer in positive mode or negative mode. EI-MS spectra were recorded on a Waters Micromass GCT spectrometer. Values are reported as a ratio of mass to charge ( $m/z$ ).

## 2. Experimental Details and Analytical Data

### **1- Iodination of *cis*-1,2,4,5-tetrafluoro-3-phenylcyclohexane 3**

Iodine (600 mg, 2.36 mmol) was added to a solution of all *cis*-1,2,4,5-tetrafluoro-3-phenylcyclohexane **3** (500 mg, 2.15 mmol) in acetic acid (50 ml), periodic acid 50 % (w/w) (0.123 mL, 0.43 mmol), conc.  $\text{H}_2\text{SO}_4$  95 % (0.28 mL, 5.4 mmol), and water (10 mL). The solution was heated for 16h at 70 °C and then the mixture was left to cool to room temperature. The reaction was quenched by a adding of solution of saturated sodium bisulfite (30 mL), then the mixture was washed with ethyl acetate (3 × 50 mL). The organic layers were combined and dried over sodium sulfate, filtered and the solvent evaporated

under reduced pressure (710 mg 92 % overall yield). The product was purified by flash column chromatography using diethyl ether / petrol (1:2), as an eluent.

This gave **4:5:6:7** in a ratio of 1:5:15:4 respectively.

#### All *cis* -1,2,4,5-tetrafluoro-3-(2-iodophenyl)-cyclohexane (**4**)

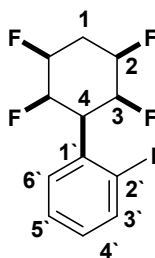

Colorless solid (28 mg, 3.6 %). **mp** 169 - 170 °C;  $^1\text{H NMR}$  (400 MHz,  $\text{CDCl}_3$ )  $\delta_{\text{H}}$  7.96 (1H, dd,  $J$  7.9, 1.6 Hz, **CH-6'**), 7.90 (1H, dd,  $J$  8.0, 1.3 Hz, **CH-3'**), 7.41 (1H, td,  $J$  7.6, 1.3 Hz **CH-5'**), 7.05 (1H, td,  $J$  7.6, 1.6 Hz, **CH-4'**), 5.11 - 4.91 (2H, m, **CHF-3**), 4.82 - 4.57 (2H, m, **CHF-2**), 3.13 (1H, tt,  $J$  36.8, 1.6 Hz, **CH-4**), 2.84 - 2.69 (1H, m, **CH<sub>A</sub>H<sub>B</sub>-1**), 2.55 - 2.46 (1H, m, **CH<sub>A</sub>H<sub>B</sub>-1**);  $^{13}\text{C NMR}$  (100 MHz,  $\text{CDCl}_3$ )  $\delta_{\text{C}}$  139.7, 137.9, 131.1 (t,  $J$  6.6 Hz), 130.1, 129.2, 101.3 (**C-2'**), 89.6 - 87.7 (m, **CHF-3**), 88.7 - 85.9 (m, **CHF-2**), 47.4 (m, **CH-4**), 27.3 (tt,  $J$  22.1, 2.4 Hz, **CH<sub>2</sub>-1**);  $^{19}\text{F}\{^1\text{H}\}$  NMR (376 MHz,  $\text{CDCl}_3$ )  $\delta_{\text{F}}$  -189.9 (2F, dd,  $J$  7.7, 5.6 Hz, **CHF-2**), -210.9 (2F, dd,  $J$  7.7, 5.5 Hz, **CHF-3**); (**ESI**<sup>+</sup>) [2M+6H]<sup>+</sup> calcd for  $\text{C}_{12}\text{H}_{11}\text{IF}_4$ <sup>+</sup>: 721.9684 found: 722.2411

#### All *cis* -1,2,4,5-tetrafluoro-3-(2, 4-diiodophenyl)-cyclohexane (**7**)

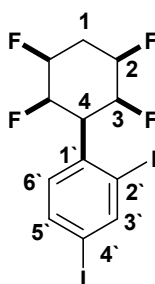

Colorless solid (122 mg, 15.8 %). **mp** 203 - 204 °C;  $^1\text{H NMR}$  (400 MHz,  $\text{CDCl}_3$ )  $\delta_{\text{H}}$  8.24 (1H, d,  $J$  2.2 Hz, **CH-3'**), 7.59 (1H, d,  $J$  8.4, **CH-6'**), 7.38 (1H, dd,  $J$  8.4, 2.2 Hz **CH-5'**), 5.10 - 4.84 (2H, m, **CHF-3**), 4.87 - 4.55 (2H, m, **CHF-2**), 3.04 (1H, tt,  $J$  36.2, 1.6 Hz, **CH-4**), 2.82 - 2.68 (1H, m, **CH<sub>A</sub>H<sub>B</sub>-1**), 2.54 - 2.46 (1H, m, **CH<sub>A</sub>H<sub>B</sub>-1**);  $^{13}\text{C NMR}$  (100 MHz,  $\text{CDCl}_3$ )  $\delta_{\text{C}}$  140.9, 139.8, 139.8, 139.2, 100.5, 99.9, 89.3 - 87.6 (m, **CHF-3**), 87.6 - 85.7 (m, **CHF-2**), 47.1 (m, **CH-4**),

27.2 (tt, *J* 22.2, 2.3 Hz, CH<sub>2</sub>-1); <sup>19</sup>F{<sup>1</sup>H} NMR (376 MHz, CDCl<sub>3</sub>) δ<sub>F</sub> -189.9 (2F, dd, *J* 7.9, 5.5 Hz, CHF-2), -210.6 (2F, dd, *J* 8.0, 4.9 Hz, CHF-3); (ESI<sup>+</sup>) [M+Na]<sup>+</sup> calcd for C<sub>12</sub>H<sub>10</sub>I<sub>2</sub>F<sub>4</sub><sup>+</sup>: 506.8706 found: 506.2082.

All *cis* -1,2,4,5-tetrafluoro-3-(3'-iodophenyl)-cyclohexane **5**, all *cis* -1,2,4,5-tetrafluoro-3-(4'-iodophenyl)-cyclohexane **6** (560 mg 72 %) were isolated as an inseparable mixture, and were not fully characterized at this stage, in ratio (1:3) respectively.

### **General Procedure for the preparation of 9 and 10.**

A flame dried, three-necked, round bottomed flask (25 mL) equipped with an argon inlet adapter, reflux condenser, rubber septum, and magnetic stir bar was charged with zinc dust (190 mg, 3.0 mmol) and iodine (38 mg, 0.15 mmol). The flask is evacuated and flushed with argon three times and then DMF (1mL) a solution of iodoalanine (330 mg, 1.00 mmol) in DMF (1mL) was added dropwise *via* syringe at 0 °C. The reaction was kept stirred at 0 °C for 30 min to generate a solution of the zinc reagent. The ice bath is removed and the aryl iodide (300 mg, 0.84 mmol), tris(dibenzylideneacetone)dipalladium (11 mg, 0.0125 mmol), and Sphos (11 mg, 0.025 mmol) were added and the reaction mixture stirred at 60 °C for 16 h. The resulting mixture was poured into a conical flask containing water (10 mL). Citric acid solution (5ml of 10 %) was added in order to break up the black emulsion. The aqueous mixture was extracted into DCM (2 × 60 mL), and the combined organic layers are washed with of water (30 mL) and of brine (30 mL). The organic fractions were dried and filtered. Concentration under vacuum gave the product which was purified over silica gel using petrol /ethyl acetate/DCM, (7:2:1) as an eluent

**Methyl -2S-2-(*tert*-Butoxycarbonylamino)-3-(4-(all-*cis*-2,3,5,6-tetrafluoro cyclohex-1-yl) phenyl)propanoate (9)**

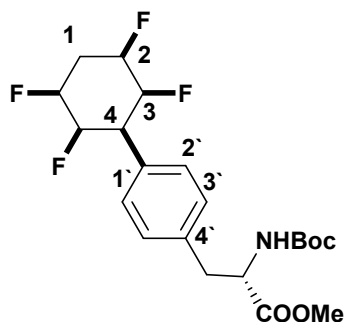

Colorless solid (216 mg, 59 %). **mp** 186 - 187 °C;  $[\alpha]_D^{20} + 22.0$  ( $c = 1 \times 10^{-3}$ ,  $\text{CHCl}_3$ );  $^1\text{H NMR}$  (300 MHz,  $\text{CDCl}_3$ )  $\delta_{\text{H}}$  7.39 (2H, d,  $J$  7.6 Hz, **CH-2'**), 7.13 (2H, d,  $J$  8.0, **CH-3'**), 5.02 - 4.82 (3H, m, **CHF-3**, **NHBoc**), 4.780 - 4.46 (3H, m, **CHF-2**, **CHNHBoc**), 3.71 (3H, s,  $\text{COOCH}_3$ ), 3.17-2.97 (2H, m,  $\text{PhCH}_2$ ), 2.79 - 2.38 (3H, m, **CH-4**,  $\text{CH}_A\text{H}_B$ -1), 1.39 (9H, s,  $\text{C}(\text{CH}_3)_3$ );  $^{13}\text{C NMR}$  (100 MHz,  $\text{CDCl}_3$ )  $\delta_{\text{C}}$  172.3, 155.1, 136.0, 134.3, 129.7, 129.4, 90.1 - 88.0 (m, **CHF-3**), 88.0 - 86.1 (m, **CHF-2**), 80.0, 54.3, 52.3, 43.7, 38.0, 28.2, 27.1 (tt,  $J$  22.3, 2.2 Hz,  $\text{CH}_2$ -1);  $^{19}\text{F}\{^1\text{H}\}$  NMR (282 MHz,  $\text{CDCl}_3$ )  $\delta_{\text{F}}$  -190.7 (2F, dd,  $J$  7.7, 5.5 Hz, **CHF-2**), -210.3 (2F, dd,  $J$  8.0, 5.1 Hz, **CHF-3**); (**ESI+**)  $m/z$   $[\text{M}+\text{Na}]^+$  calcd for  $\text{C}_{21}\text{H}_{27}\text{F}_4\text{NO}_4$ : 456.1774 found: 456.1762

**Methyl -2S-(tert-Butoxycarbonylamino)-3-(3-(all-cis-2,3,5,6-tetrafluorocyclohex-1-yl) phenyl) propanoate. (10)**

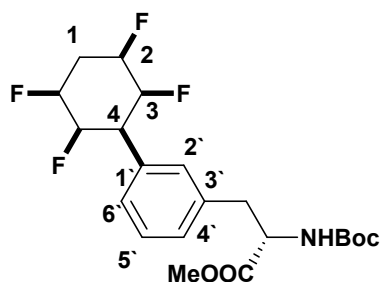

Colorless solid (88 mg, 24 %). **mp** 164 - 165 °C;  $[\alpha]_D^{20} + 35.0$  ( $c = 1 \times 10^{-3}$ ,  $\text{CHCl}_3$ );  $^1\text{H NMR}$  (300 MHz,  $\text{CDCl}_3$ )  $\delta_{\text{H}}$  7.33 - 7.27 (3H, m, **CH-2'**, **CH-4'**, **CH-6'**), 7.16 - 7.09 (1H, m, **CH-5'**), 5.10 - 4.87 (3H, m, **CHF-3**, **NHBoc**), 4.78 - 4.47 (3H, m, **CHF-2**, **CHNHBoc**), 3.72 (3H, s,  $\text{COOCH}_3$ ), 3.19 - 3.02 (2H, m,  $\text{PhCH}_2$ ), 2.83 - 2.40 (3H, m, **CH-4**,  $\text{CH}_A\text{H}_B$ -1), 1.41 (9H, s,  $\text{C}(\text{CH}_3)_3$ );  $^{13}\text{C NMR}$  (126 MHz,  $\text{CDCl}_3$ )  $\delta_{\text{C}}$  172.1, 155.0, 136.7, 135.8, 130.2, 129.2, 128.9, 127.8, 89.8 - 88.2 (m, 2C, **CHF-3**), 87.8 - 86.3 (m, 2C, **CHF-2**), 79.9, 54.3, 52.3, 43.8 (tt, 1 C  $J$  17.5, 5.8 Hz **CH-4**), 38.3), 28.2, 27.1 (tt,  $J$  22.3, 2.2 Hz,  $\text{CH}_2$ -1);  $^{19}\text{F}\{^1\text{H}\}$  NMR (282 MHz,

CDCl<sub>3</sub>)  $\delta_F$  -190.7 (2F, dd, *J* 7.1, 5.1 Hz, CHF-2), -210.0 (2F, dd, *J* 7.2, 5.0 Hz, CHF-3); (ESI+) *m/z* [M+Na]<sup>+</sup> calcd for C<sub>21</sub>H<sub>27</sub>F<sub>4</sub>NO<sub>4</sub><sup>+</sup>: 456.1774 found: 456.1759

**(2S)-2-(aminohydrochloride)-3-(4-(all- cis -2,3,4,5-tetrafluorocyclohex-1-yl)phenyl)propanoic (11)**

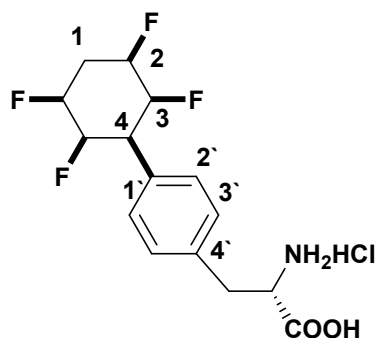

A solution of **9** (70 mg, 0.161 mmol) in HCl 6 M :1,4-dioxane (1:1) (4 mL) and anisole (26 mg, 0.24 mmol) was stirred at 70 °C for 48 h, until TLC showed that the substrate had been consumed. The reaction mixture was diluted with water (10 mL) and the aqueous washed with ethyl acetate (2 × 15 ml). The aqueous was the evaporated under reduced pressure, to afford the hydrochloride salt **11** (52 mg, 91 %) as colorless needles. **mp** 273 - 274 °C;  $[\alpha]_D^{20} + 60.0$  (*c* = 2 × 10<sup>-4</sup>, DMSO); <sup>1</sup>H NMR (400 MHz, d<sub>6</sub>-DMSO)  $\delta_H$  8.36 (3H, bs, NH<sub>3</sub>Cl), 7.45 (2H, d, *J* 7.8 Hz, CH-2'), 7.29 (2H, d, *J* 7.9 Hz, CH-3'), 5.19 – 4.83 (4H, m, CHF-3, CHF-2), 4.17 (1H, t, *J* 6.0 Hz, CHNH<sub>3</sub>Cl), 3.25- 3.5 (3H, m, PhCH<sub>2</sub>, CH-4), 2.46 – 2.29 (2H, m, CH<sub>A</sub>H<sub>B</sub>-1); <sup>13</sup>C NMR (126 MHz, d<sub>6</sub>-DMSO)  $\delta_C$  170.8, 136.1, 134.5, 130.0, 129.4, 90.8 – 89.1 (m, CHF-3), 88.7 – 88.3 (m, CHF-2), 53.7, 35.8, 42.0, 27.4 (tt, *J* 22.1, 3.0 Hz, CH<sub>2</sub>-1); <sup>19</sup>F{<sup>1</sup>H} NMR (376 MHz, d<sub>6</sub>-DMSO)  $\delta_F$  -189.4 (2F, dd, *J* 8.1, 4.6 Hz, CHF-2), -209.7 (2F, dd, *J* 8.1, 5.8 Hz, CHF-3); (ESI+) *m/z* [M-HCl + H]<sup>+</sup> calcd for C<sub>15</sub>H<sub>18</sub>ClF<sub>4</sub>NO<sub>2</sub><sup>+</sup>: 320.1273 found 320.1263;

**(2S)- 2-(Aminohydrochloride)-3-(3-(all- cis -2,3,5,6-tetrafluorocyclohex-1-yl)phenyl)propanoic (12)**

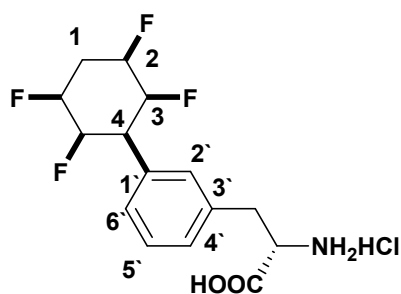

A solution of **10** (50 mg, 0.115 mmol) HCl 6 M :1,4-dioxane (1:1) (4 mL) and anisole (21 mg, 0.20 mmol) was stirred at 70 °C for 48 hr, until TLC showed that the substrate was consumed. The reaction mixture was diluted with water (10 mL) and washed with ethyl acetate (2 × 15 ml). The aqueous was collected and evaporated under vacuum, to afford the hydrochloride salt **12** (38 mg, 92 %) as colorless solid. **mp** 223 - 224 °C;  $[\alpha]_D^{20} + 42.0$  ( $c = 2 \times 10^{-4}$ , DMSO); **<sup>1</sup>H NMR** (500 MHz,  $d_6$ -DMSO)  $\delta_H$  8.41 (3H, bs,  $NH_3Cl$ ), 7.24 - 7.17 (4H, m,  $CH-2'$ ,  $CH-4'$ ,  $CH-5'$ ,  $CH-6'$ ), 5.19 - 4.87 (4H, m,  $CHF-3$ ,  $CHF-2$ ), 4.13 (1H, bs,  $CHNH_3Cl$ ), 3.14 (2H, m,  $PhCH_2$ ), 2.44 - 2.36 (3H, m,  $CH-4$ ,  $CH_AH_B-1$ ); **<sup>13</sup>C NMR** (126 MHz,  $CDCl_3$ )  $\delta_C$  170.8, 137.5, 135.6, 130.5, 129.1, 128.8, 128.1, 90.9 - 89.2 (m, 2C,  $CHF-3$ ), 88.1 - 86.7 (m, 2C,  $CHF-2$ ), 67.7, 53.7, 36.3.0, 27.5 (bt,  $CH_2-1$ ); **<sup>19</sup>F{<sup>1</sup>H} NMR** (470 MHz,  $d_6$ -DMSO)  $\delta_F$  -189.4 (2F, bs,  $CHF-2$ ), -209.4 (2F, m,  $CHF-3$ ); **(ESI+)**  $m/z$   $[M-HCl + H]^+$  calcd for  $C_{15}H_{18}ClF_4NO_2^+$ : 320.1273 found 320.1266; **(ESI-)**  $m/z$   $[M-H]^+$  calcd for  $C_{15}H_{18}ClF_4NO_2^+$ : 354.0962 found 354.0890;

**(2S)- 2-(tert-Butoxycarbonylamino)-3-(4-(all cis-2,3,5,6-tetrafluorocyclohex-1-yl)phenyl)propanoic. (13)**

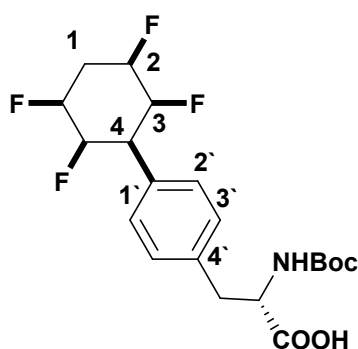

Di-*tert*-butyl dicarbonate (45 mg, 0.2 mmol), and sodium bicarbonate (46 mg, 0.54 mmol) was added to a solution of **11** (60 mg, 0.17 mmol) in mixture of water and THF 1:1 (3mL). The reaction was stirred at 0 °C for 1 h then left to come to ambient over 16h. The reaction

mixture was then extracted into diethyl ether (2 × 20 mL) and the aqueous layer was acidified to pH 2 with HCl 1 M, and then extracted into ethyl acetate (2 × 30). The organic layers was dried over sodium sulfate, filtered and evaporated under vacuum to afford *N*-*boc* amino acid **13** (66 mg, 93 %). **mp** 189 - 190 °C.  $[\alpha]_D^{20} + 50$  (c= 2 × 10<sup>-4</sup>, CHCl<sub>3</sub>); <sup>1</sup>H NMR (400 MHz, CDCl<sub>3</sub>) δ<sub>H</sub> 7.45 (2H, d, *J* 7.7 Hz, CH-2'), 7.20 (2H, d, *J* 8.0, CH-3'), 5.09 – 4.88 (3H, m, CHF-3, NH*Boc*), 4.74 – 4.48 (3H, m, CHF-2, CHNH*Boc*), 3.23-3.05 (2H, m, PhCH<sub>2</sub>), 2.78 – 2.49 (3H, m, CH-4, CH<sub>A</sub>H<sub>B</sub>-1), 1.42 (9H, s, C(CH<sub>3</sub>)<sub>3</sub>); <sup>13</sup>C NMR (100 MHz, CDCl<sub>3</sub>) δ<sub>C</sub> 175.8, 155.3, 135.7, 134.5, 129.9, 129.4, 90.2 – 88.1 (m, CHF-3), 88.1 – 86.1 (m, CHF-2), 85.3, 54.3, 43.6, 37.2, 28.3, 27.1 (tt, *J* 22.3, 2.2 Hz, CH<sub>2</sub>-1); <sup>19</sup>F{<sup>1</sup>H} NMR (470 MHz, CDCl<sub>3</sub>) δ<sub>F</sub> -190.1 (2F, bt, CHF-2), -209.4 (2F, bt, CHF-3); (ESI<sup>+</sup>) *m/z* [M+Na]<sup>+</sup> calcd for C<sub>20</sub>H<sub>25</sub>F<sub>4</sub>NO<sub>4</sub><sup>+</sup>: 442.1618 found 442.1605;

**Methyl-(2*S*)-2 [N-((2*S*)-2-(*tert*-Butoxycarbonylamino)-3-(4-(all *cis*-2,3,5,6-tetrafluorocyclohex-1-yl)phenyl)propanoyl]-2-amino-3-phenylpropanoate. (**14**)**

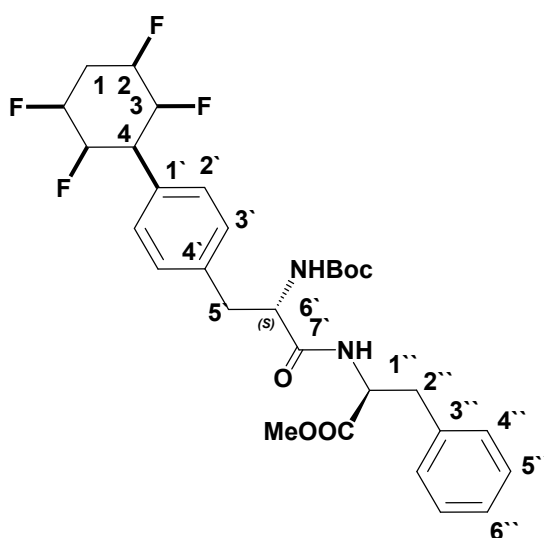

EDCI hydrochloride (30 mg, 0.15 mmol) and NMM (mg, 0.48 mmol) were added to a solution of *N*-*Boc* amino acid **13** (50 mg, 0.119 mmol) (1mL) and HOBT (20 mg, 0.148 mmol) in dry DMF and the solution was stirred for 5 min at 0 °C. *L*-Phenylalanine OMe hydrochloride **14** (31 mg, 0.144 mmol) was added and the solution was stirred at room temperature for 16h. The reaction was diluted by sat ammonium chloride solution (10 mL), stirred for 1 h and then extracted into ethyl acetate (2 × 30 mL). The organic layer was washed with NaHCO<sub>3</sub> 10 % (20 mL), and brine (10 mL), dried and then the organic



solvent was evaporated under reduced pressure. The product was purified over silica gel using by ethyl acetate / petrol (1:1) as an eluent, to afford peptide **14** as a white solid (60 mg, 87 %). **mp** 136 - 137 °C.  $[\alpha]_D^{20} + 20$  ( $c = 2 \times 10^{-4}$ ,  $\text{CHCl}_3$ );  **$^1\text{H NMR}$**  (500 MHz,  $\text{CDCl}_3$ )  $\delta_{\text{H}}$  7.39 (2H, d,  $J$  7.7 Hz,  $\text{CH-2}'$ ), , 7.26-7.18 (5H, m,  $\text{CH}, \text{CH}''$ ), 6.98 (2H, d,  $J$  8.0 Hz,  $\text{CH}, \text{CH}''$ ), 6.26 (1H, bd, C-1''- $\text{NH}$ ), 5.02 – 4.89 (3H, m,  $\text{CHF-3}$ ,  $\text{NH Boc}$ ), 4.78 (1H, bs,  $\text{H-1}''$ ), 4.70 – 4.52 (2H, m,  $\text{CHF-2}$ ), 4.34 (1H, bs,  $\text{H-6}''$ ), 3.68 (3H, s,  $\text{COOMe}$ ), 3.11 - 3.00 (4H, m,  $\text{CH}_2\text{-5}'$ ,  $\text{CH}_2\text{-2}''$ ), 2.80–2.70 (1H, m,  $\text{CH}_\text{A}\text{H}_\text{B}\text{-1}$ ), 2.56 (1H, t,  $J$  37.1 Hz,  $\text{H-4}$ ), 2.48–2.43 (1H, m,  $\text{CH}_\text{A}\text{H}_\text{B}\text{-1}$ ), 1.40 (9H, s,  $\text{C}(\text{CH}_3)_3$ );  **$^{13}\text{C NMR}$**  (126 MHz,  $\text{CDCl}_3$ )  $\delta_{\text{C}}$  171.3, 170.5, 155.2, 136.5, 135.5, 134.3, 129.7, 129.5, 129.2, 128.5, 127.1, 89.7 – 88.2 (m,  $\text{CHF-3}$ ), 87.8 – 86.2 (m,  $\text{CHF-2}$ ), 55.7, 53.2, 52.3, 43.8, 37.9, 29.7, 28.2, 27.1 (t,  $J$  22.0 Hz,  $\text{CH}_2\text{-1}$ );  **$^{19}\text{F}\{^1\text{H}\}$  NMR** (470 MHz,  $\text{CDCl}_3$ )  $\delta_{\text{F}}$  -190.2 (2F, m,  $\text{CHF-2}$ ), -209.7 (2F, m,  $\text{CHF-3}$ ); (**ESI+**)  $m/z$   $[\text{M}+\text{Na}]^+$  calcd for  $\text{C}_{30}\text{H}_{36}\text{F}_4\text{N}_2\text{O}_5^+$ : 603.2458 found 603.2440.

**Methyl-2S-2 [N-((S)-2-(aminotrifluoroacetic)-3-(4-(all *cis*-2,3,5,6-tetrafluorocyclohex-1-yl)phenyl)propanoyl)-2-amino-3-phenylpropanoate (**15**)**

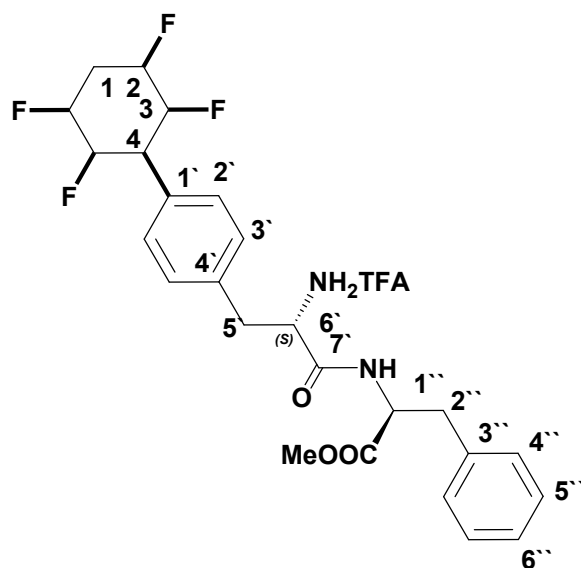

A solution of **14** (20 mg, 0.034 mmol) in a mixture of DCM and TFA (4 : 1) (2 mL) was stirred at RT for 4 h, until TLC showed the consumption of starting. The reaction mixture was then diluted with water (10 mL) and extracted into diethyl ether ( $2 \times 15$  ml), and the organic layer was washed with water (20 mL). The aqueous layers were collected and evaporated under vacuum and the product was purified using a C-18 coated silica cartridge

with water/methanol (1:1) as the eluent to afford trifluoroacetate salt **15** (18 mg, 94 %) as colorless solid. **mp** 240 °C.  $[\alpha]_D^{20} + 45$  ( $c = 2 \times 10^{-4}$ , DMSO);  $^1\text{H NMR}$  (300 MHz,  $\text{CD}_3\text{COCD}_3$ )  $\delta_{\text{H}}$  7.46 – 7.15 (9H, m, **CH-2'**, **CH-3'**, **H-5''**, **H-6''**, **H-7''**), 5.21 – 4.79 (6H, m, **CHF-2**, **CHF-3**, **H-6'**, **NH**), 4.68 (1H, m, **H-1''**), 3.69 (3H, s, **COOMe**), 3.40 - 3.15 (4H, m, **CH<sub>2</sub>-5'**, **CH<sub>2</sub>-2''**), 3.12 – 2.99 (1H, m, **CH<sub>A</sub>H<sub>B</sub>-1**), 2.59 – 2.41 (2H, m, **H-4**, **CH<sub>A</sub>H<sub>B</sub>-1**);  $^{13}\text{C NMR}$  (100 MHz,  $\text{CD}_3\text{COCD}_3$ )  $\delta_{\text{C}}$  170.2, 167.0, 159.9, 138.5, 137.3, 134.6, 129.8, 129.6, 129.4, 129.3, 129.1, 128.3, 126.7, 126.7, 126.6, 115.7, 91.0 – 88.6 (m, 2C, **CHF-3**), 88.2 – 86.0 (m, 2C, **CHF-2**), 65.3, 57.1, 51.6, 42.6, 36.3, 36.1, 27.3 – 26.8 (m, **CH<sub>2</sub>-1**);  $^{19}\text{F}\{^1\text{H}\}$  **NMR** (470 MHz,  $\text{CD}_3\text{COCD}_3$ )  $\delta_{\text{F}}$  -76.3 (3F, s, **CF<sub>3</sub>COO**), -191.3 (2F, **CHF-2**), -210.8 (2F, m, **CHF-3**); **(ESI+)**  $m/z$   $[\text{M-TFA+H}]^+$  calcd for  $\text{C}_{27}\text{H}_{29}\text{F}_7\text{N}_2\text{O}_5^+$ : 481.2036 found 481.2094

**Methyl -2S-2- (aminohydrochloride)-3-(4-(all *cis*-2,3,5,6-tetrafluorocyclohex-1-yl))phenylpropanoate. (16)**

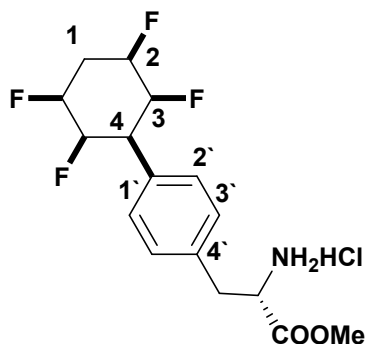

A solution of protected amino acid **9** (90 mg, 0.208 mmol) in mixture of HCl 4 M and ethyl acetate (1:1) (3mL) was stirred for 24 hr at room temperature, until the starting material was consumed. The reaction mixture was extracted into ethyl acetate (2 × 30 ml), and the organic layers washed with water (20 mL). The aqueous layers were collected and evaporated at reduced pressure, to afford hydrochloride salt **16** without further purification (74 mg, 96 %) as colorless solid **mp** 240 - 241 °C  $[\alpha]_D^{20} +70.0$  ( $c = 2 \times 10^{-4}$ , DMSO);  $^1\text{H NMR}$  (300 MHz,  $\text{D}_2\text{O}$ )  $\delta_{\text{H}}$  7.45 (2H, d,  $J$  8.1 Hz, **CH-2'**), 7.21 (2H, d,  $J$  8.2, **CH-3'**), 5.25 – 5.03 (2H, m, **CHF-3**), 4.97 – 4.77 (2H, m, **CHF-2**), 4.33 (1H, dd,  $J$  7.2, 6.0 Hz **CHNH<sub>3</sub>Cl**), 3.71 (3H, s, **COOCH<sub>3</sub>**), 3.28 – 3.04 (3H, m, **PhCH<sub>2</sub>**, **CH<sub>A</sub>H<sub>B</sub>-1**), 2.49-2.35 (2H, m, **CH-4**,

CH<sub>A</sub>H<sub>B</sub>-1); <sup>13</sup>C NMR (100 MHz, d<sub>6</sub>-DMSO) δ<sub>C</sub> 169.8, 136.2, 134.2, 129.9, 129.5, 90.9 – 89.1 (m, CHF-3), 88.5 – 86.3 (m, CHF-2), 53.5, 53.0 41.9, 35.8, 27.3 (t, *J* 21.3, Hz, CH<sub>2</sub>-1); <sup>19</sup>F{<sup>1</sup>H} NMR (282 MHz, D<sub>2</sub>O) δ<sub>F</sub> –190.9 (2F, dd, *J* 7.7, 5.5 Hz, CHF-2), –210.4 (2F, dd, *J* 8.3, 4.4 Hz, CHF-3); (ESI+) *m/z* [M-HCl+Na]<sup>+</sup> calcd for C<sub>16</sub>H<sub>20</sub>ClF<sub>4</sub>NO<sub>2</sub><sup>+</sup>: 356.1250 found 356.1237

**Methyl-2S-2N [(S-2-(*tert*-Butoxycarbonylamino)-3-phenylpropanoyl]-3-(4-(all *cis*-2,3,5,6-tetrafluorocyclohex-1-yl)phenyl)-2-amino-propanoate (17)**

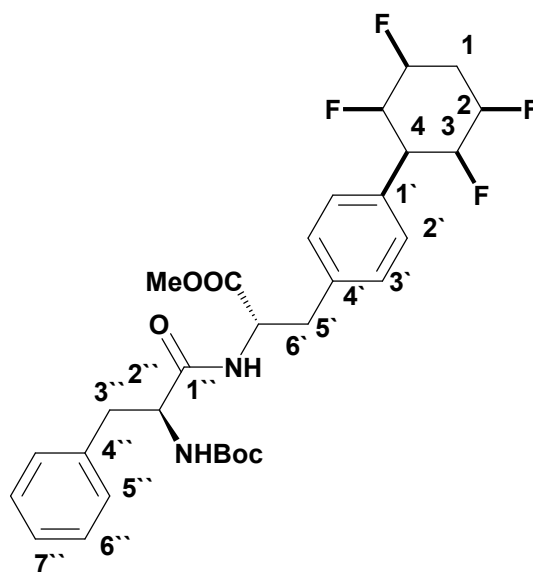

HOBt (19 mg, 0.14 mmol), EDCI hydrochloride (34 mg, 0.14 mmol) and DIPEA (63 mg, 0.48 mmol) were added to a solution of N-Boc-L-phenylalanine acid (34 mg, 0.128 mmol) in dry DMF (1mL) and the solution was stirred for 5 min at 0 °C. Amino acid hydrochloride **16** (40 mg, 0.108 mmol) was then added and the solution was stirred at room temperature for 12 h. The reaction was then quenched by the addition of sat. ammonium chloride (10 mL), stirred for a further 1 h and was then extracted into ethyl acetate (2 × 30 mL). The organic layer was washed with NaHCO<sub>3</sub> 10 % (20 mL) and brine (20 mL), dried and the solvent evaporated under reduced pressure. The product was purified over silica gel using ethyl acetate / petrol (1:2) as an eluent to afford the target peptide as a white solid (58 mg, 92 %). **mp** 194 - 195 °C [ $\alpha$ ]<sub>D</sub><sup>20</sup> + 25.0 (*c* = 2 × 10<sup>-4</sup>, CHCl<sub>3</sub>); <sup>1</sup>H NMR (500 MHz, CDCl<sub>3</sub>) δ<sub>H</sub> 7.35 (2H, d, *J* 7.7 Hz, CH-2'), 7.27 (2H, d, *J* 7.0, CH-3'), 7.26-7.18 (3H, m, CH''), 7.0 (2H, d, *J* 8.0 Hz, CH''), 6.38 (1H, d, *J* 7.7 Hz, C1''-NH), 5.02 – 4.90 (3H, m, CHF-3, NHBoc), 4.77 (1H, bs, H-6'),

4.71 – 4.53 (2H, m, CHF-2), 4.34 (1H, bs, H-2''), 3.67 (3H, s, COOMe), 3.11 - 2.99 (4H, m, CH<sub>2</sub>-5', CH<sub>2</sub>-3''), 2.78–2.68 (1H, m, CH<sub>A</sub>H<sub>B</sub>-1), 2.56 (1H, t, *J* 37.1 Hz, H-4), 2.48–2.42 (1H, m, CH<sub>A</sub>H<sub>B</sub>-1), 1.40 (9H, s, C(CH<sub>3</sub>)<sub>3</sub>); <sup>13</sup>C NMR (126 MHz, CDCl<sub>3</sub>) δ<sub>C</sub> 171.2, 170.9, 155.4, 136.4, 135.6, 134.4, 129.7, 129.4, 128.7, 127.0, 89.8 – 88.1 (m, CHF-3), 87.7 – 86.3 (m, CHF-2), 55.8, 53.2, 52.3 43.6, 38.2, 37.5, 37.0, 28.2, 27.1 (tt, *J* 22.0, 2.3 Hz, CH<sub>2</sub>-1); <sup>19</sup>F{<sup>1</sup>H} NMR (470 MHz, CDCl<sub>3</sub>) δ<sub>F</sub> -190.2 (2F, m, CHF-2), -209.7 (2F, m, CHF-3); (ESI+) *m/z* [M+Na]<sup>+</sup> calcd for C<sub>30</sub>H<sub>36</sub>F<sub>4</sub>N<sub>2</sub>O<sub>5</sub><sup>+</sup>: 603.2458 found 603.2444.

**Methyl-2S-2N [(S-2-(ammoniumtrifluoroacetate)-3-phenylpropanoyl]-3-(4-(all cis-2,3,5,6-tetrafluorocyclohex-1-yl)phenyl)-2-amino-propanoate (19a)**

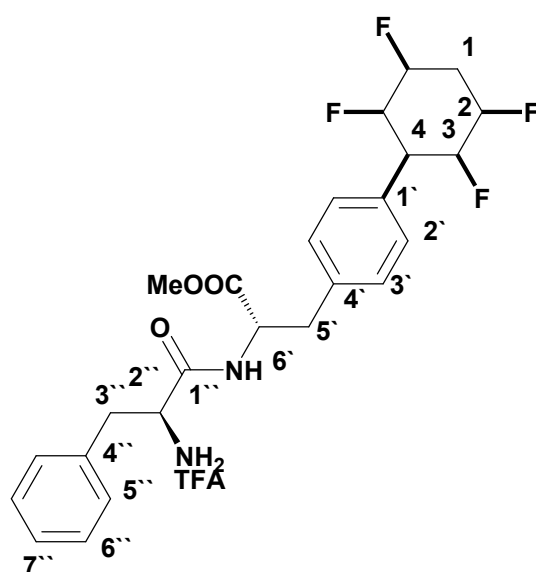

A solution of **17** (15 mg, 0.025 mmol) in a mixture of DCM and TFA (4 : 1) (2 mL) was stirred at room temperature and then the reaction mixture was diluted by water (10 mL) and extracted into diethyl ether (2 × 15 ml). The organic layer was then washed with water (20 mL) the aqueous layer collected and evaporated under vacuum, to afford the trifluoroacetate salt **19a** (13 mg, 89 %) as a colorless solid. **mp** decompose at 230 °C, [α]<sub>D</sub><sup>20</sup> + 40.0 (c= 2 × 10<sup>-4</sup>, DMSO); <sup>1</sup>H NMR (300 MHz, CD<sub>3</sub>COCD<sub>3</sub>) δ<sub>H</sub> 7.50 (2H, d, *J* 7.6 Hz, CH-2'), 7.35 (2H, d, *J* 8.6, CH-3'), 7.30-7.10 (5H, m, H-5'', H-6'', H-7''), 5.22 – 4.77 (6H, m, CHF-2, CHF-3, H-2'', C1''-NH), 4.68 (1H, dd, *J* 9.8, 4.7 Hz, H-6'), 3.70 (3H, s, COOMe), 3.37 - 3.14 (4H, m, CH<sub>2</sub>-5', CH<sub>2</sub>-3''), 3.09 – 3.01 (1H, m, CH<sub>A</sub>H<sub>B</sub>-1), 2.55 – 2.40 (2H, m, H-4, CH<sub>A</sub>H<sub>B</sub>-1),

$^{13}\text{C}$  NMR (126 MHz,  $\text{CD}_3\text{COCD}_3$ )  $\delta_{\text{C}}$  171.2, 166.6, 159.4 (1C, q,  $J$  36.0, Hz,  $\text{CF}_3\text{COO}$ ), 136.4, 135.6, 135.1, 129.4, 129.4, 129.2, 128.6, 127.3, 116.2 (q, 1C,  $J$  288.9 Hz,  $\text{CF}_3\text{COO}$ ), (90.6 – 89.0 (m, 2C, CHF-3), 87.8 – 86.3 (m, 2C, CHF-2), 63.9, 54.0, 51.7, 42.7, 37.0, 36.1, 27.0 (tt,  $J$  21.7, 3.5 Hz,  $\text{CH}_2$ -1);  $^{19}\text{F}\{^1\text{H}\}$  NMR (282 MHz,  $\text{CD}_3\text{COCD}_3$ )  $\delta_{\text{F}}$  -76.3 (3F, s,  $\text{CF}_3\text{COO}$ ), -191.3 (2F, dd,  $J$  6.9, 1.8 Hz, CHF-2), -210.7 (2F, dd,  $J$  8.7, 2.6 Hz, CHF-3); (ESI+)  $m/z$   $[\text{M-TFA+H}]^+$  calcd for  $\text{C}_{27}\text{H}_{29}\text{F}_7\text{N}_2\text{O}_5^+$ : 481.2036 found 481.2095.

**Methyl-2S-2N[[(2S)-2-(9-Fluorenylmethoxycarbonylamino)-3-phenylpropanoyl]-3-(4-(all cis-2,3,5,6-tetrafluorocyclohex-1-yl)phenyl propanoate (18).**

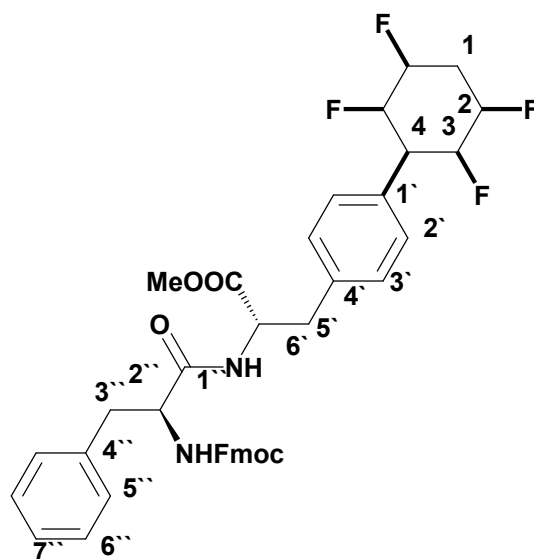

HBTU (27 mg, 0.071 mmol), NMM (11 mg, 0.10 mmol) and HOBT (10 mg, 0.074 mmol) were added to a solution of N-Fmoc-phenylalanine (25 mg, 0.064 mmol) **X** in dry DMF (1mL) and the solution was stirred for 5 min at 0 °C. Amino acid hydrochloride **16** (20 mg, 0.054 mmol) was added and the solution was stirred at room temperature for 6 h when a saturated solution of ammonium chloride (10 mL) was added and the reaction mixture was stirred for a further 10 min. The product was extracted into ethyl acetate (2 × 30 mL) and the organic layer was washed with  $\text{NaHCO}_3$  10 % (20 mL) and brine (10 mL) and dried over  $\text{MgSO}_4$ . The product was purified by over silica gel using ethyl acetate / petrol (2:1) as an eluent to afford dipeptide **18** as white solid (31 mg, 81 %). **mp** 210-212 °C.  $[\alpha]_{\text{D}}^{20} + 40.0$  ( $c = 2 \times 10^{-4}$ , DMSO);  $^1\text{H}$  NMR (300 MHz,  $\text{CD}_3\text{COCD}_3$ )  $\delta_{\text{H}}$  7.84 (2H, d,  $J$  7.6 Hz, Ar-H),

7.61 (3H, bd, **Ar-H**, **NHFmoc**), 7.43-7.17 (13H, m, **Ar-H**), 6.67 (1H, d, *J* 8.6 Hz, **NHCO**), 5.17 – 4.70 (5H, m, **CHF-3**, **CHF-2**, **CH-2''**), 4.54 – 4.46 (1H, m, **H-6'**), 4.32 – 4.24 (1H, m, **CH-9Fmoc**), 4.20 – 4.10 (2H, m, **CH<sub>2</sub>-Fmoc**), 3.67 (3H, s, **COOMe**), 3.20 - 3.00 (4H, m, **CH<sub>2</sub>-5'**, **CH<sub>2</sub>-3''**), 2.95–2.88 (1H, m, **CH<sub>A</sub>H<sub>B</sub>-1**), 2.57 – 2.38 (2H, m, **H-4**, **CH<sub>A</sub>H<sub>B</sub>-1**); <sup>13</sup>C NMR (126 MHz, CD<sub>3</sub>COCD<sub>3</sub>) δ<sub>C</sub> 171.4, 171.2, 155.9, 144.1, 141.1, 137.7, 136.1, 135.4, 129.4, 129.3, 129.2, 128.2, 127.6, 127.0, 126.3, 125.3, 125.2, 119.9, 90.5 – 89.0 (2C, m, **CHF-3**), 87.8 – 86.4, 66.3, 56.1, 53.6, 51.5, 47.0, 42.6, 37.7, 36.8, 27.0 (tt, *J* 22.2, 2.7 Hz, **CH<sub>2</sub>-1**); <sup>19</sup>F{<sup>1</sup>H} NMR (282 MHz, CD<sub>3</sub>COCD<sub>3</sub>) δ<sub>F</sub> -191.3 (2F, dd, *J* 6.3, 4.8 Hz **CHF-2**), -210.7 (2F, dd, *J* 7.7, 5.3 Hz, **CHF-3**); (**ESI+**) *m/z* [M+Na]<sup>+</sup> calcd for C<sub>40</sub>H<sub>38</sub>F<sub>4</sub>N<sub>2</sub>O<sub>5</sub><sup>+</sup>: 725.2615 found 725.2603.

**Methyl-2S-2N [((2S)-2-(amino)-3-phenylpropanoyl]-3-(4-(all-syn-2,3,5,6-tetrafluorocyclohex-1-yl)phenyl-2-aminopropanoate (19b)**

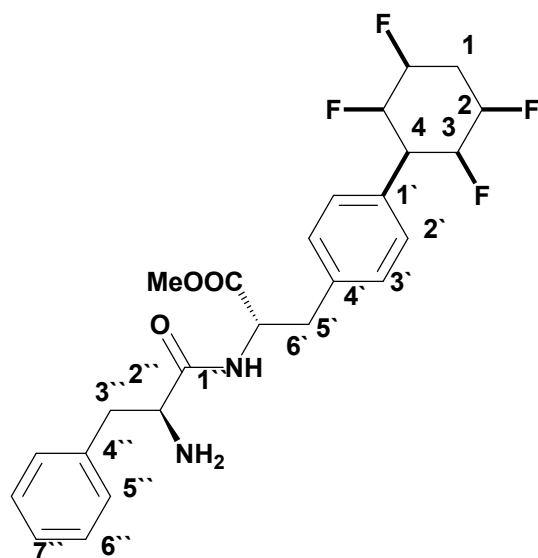

Diethylamine was added via syringe (0.012 mL, 0.11 mmol) to a solution of Fmoc-dipeptide **18** (28 mg, 0.039 mmol) in DMF (0.5 mL). The reaction was stirred for 2 hr at room temperature and then the solvent was evaporated under reduced pressure. The residue was washed with diethyl ether (3 × 10 ml) and the insoluble product was collected and dried under vacuum, to afford free amine **19b** without further purification (18 mg, 94 %) as colorless solid. **mp** decompose 270 °C.  $[\alpha]_D^{20} + 55.0$  ( $c = 2 \times 10^{-4}$ , DMSO)

*Alternative method:*

A solution of piperidine in DMF (20 %, 0.5 mL) was added to Fmoc-dipeptide **18** (15 mg, 0.021 mmol) at 0 °C and the reaction was stirred for 2 h at room temperature. The reaction mixture was diluted with water and evaporated under reduced pressure. The insoluble residue was washed with diethyl ether (3 × 10 ml) and the product dried under vacuum, to afford the free amine **19b** without further purification (10 mg, 97 %) as colorless solid. **mp** decompose 270 °C.  $[\alpha]_D^{20} + 55.0$  ( $c = 2 \times 10^{-4}$ , DMSO);  $^1\text{H NMR}$  (500 MHz,  $d_6$ -DMSO)  $\delta_{\text{H}}$  7.95 (2H, d,  $J$  11.6 Hz,  $\text{NH}_2$ ), 7.39 – 7.01 (9H, m, **Ar-H**), 5.76 (1H, s, **NHCO**), 5.07 – 4.80 (4H, m, **CHF-3**, **CHF-2**), 4.05 – 3.95 (2H, m, **H-6'**, **H-2''**), 3.40 (3H, s, **COOMe**), 3.10 – 2.88 (4H, m, **CH<sub>2</sub>-5'**, **CH<sub>2</sub>-3''**), 2.67–2.62 (1H, m, **CH<sub>A</sub>H<sub>B</sub>-1**), 2.39 – 2.34 (1H, m, **H-4**), 2.18 – 2.12 (1H, m, **CH<sub>A</sub>H<sub>B</sub>-1**);  $^{13}\text{C NMR}$  (126 MHz,  $d_6$ -DMSO)  $\delta_{\text{C}}$  166.8, 137.0, 136.1, 135.4, 130.4, 130.2, 129.2, 128.6, 127.0, 90.7 – 89.2 (2C, m, **CHF-3**), 88.0 – 86.6 (2C, m, **CHF-2**), 66.3, 60.2, 55.9, 55.7, 55.3, 42.0, 27.3 (m, **CH<sub>2</sub>-1**);  $^{19}\text{F}\{^1\text{H}\}$  NMR (470 MHz,  $d_6$ -DMSO)  $\delta_{\text{F}}$  -189.4 (2F, m, **CHF-2**), –

209.7 (2F, m, CHF-3); (ESI+)  $m/z$   $[M+Na]^+$  calcd for  $C_{25}H_{28}F_4N_2O_3^+$ : 503.1934 found 503.1916.

**Benzyl (2*S*, 5*R*, 6*R*)-6- [(N-((2*S*)-2-(tert-Butoxycarbonylamino)-3-(4-(all *cis*-2,3,5,6-tetrafluorocyclohex-1-yl)phenyl)propanoyl)amino)]-3,3-dimethyl-7-oxo-4-thia-1-azabicyclo[3.2.0]heptane-2-carboxylate (21).**

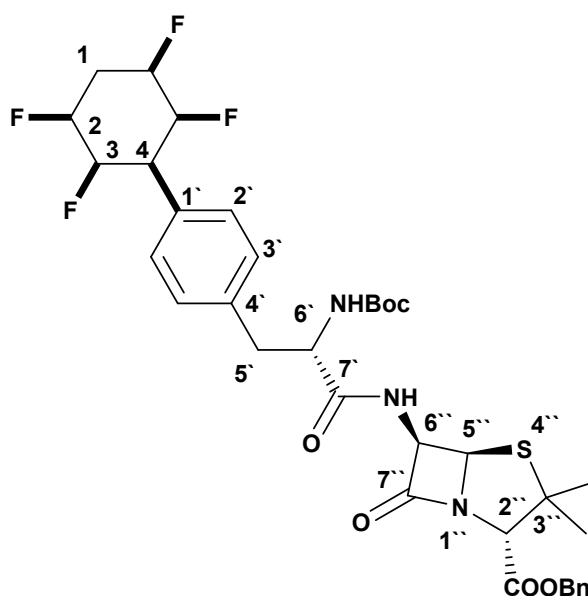

HOBt (40 mg, 0.3 mmol), EDCI hydrochloride (73 mg, 0.38 mmol) and N-methylmorpholine (58 mg, 0.57 mmol) were added to a solution of N-Boc amino acid **13** (80 mg, 0.191 mmol) in dry DMF (1mL). The solution was stirred for 5 min at 0 °C, and then 6-APA p-toluenesulfonate (100 mg, 0.21 mmol) was added and the solution stirred at room temperature 12 h. The reaction was diluted with sat. ammonium chloride solution (10 mL) and the stirred for 1 h. The product was extracted into ethyl acetate (2 × 30 mL) and the organic layer washed with NaHCO<sub>3</sub> 10 % (20 mL) and brine (20 mL) and then dried over MgSO<sub>4</sub>. Solvent removal gave the product which was purified over silica gel using ethyl acetate / petrol (1:1) as an eluent. This gave peptide **18** as a white solid (81 mg, 60 %). **mp** 153 - 154 °C.  $[\alpha]_D^{20} + 140.0$  ( $c = 2 \times 10^{-4}$ , CHCl<sub>3</sub>); <sup>1</sup>H NMR (500 MHz, CDCl<sub>3</sub>)  $\delta_H$  7.41 (2H, d,  $J$  7.8 Hz, CH-2'), 7.38 - 7.34 (5H, m, CH<sub>2</sub>Ph), 7.21 (2H, d,  $J$  7.6 Hz CH-3'), 6.74 (1H, d,  $J$  7.6 Hz, C-6''-NH), 5.59 (1H, dd,  $J$  6.6, 3.9 Hz, H-6''), 5.49 (1H, d,  $J$  4.3 Hz, H-5''), 5.20 - 5.14 (2H, m, PhCH<sub>2</sub>), 5.08 - 4.90 (3H, m, CHF-3, NHBoc), 4.78 (1H, bs, H-1''), 4.71 - 4.53 (2H, m, CHF-2), 4.41 (2H, bs, H-6', H-3''), 3.13 - 2.99 (2H, m, CH<sub>2</sub>-5''), 2.79-2.68 (1H, m, CH<sub>A</sub>H<sub>B</sub>-1), 2.59 (1H,



t,  $J$  37.3 Hz, **H-4**), 2.49–2.42 (1H, m,  $\text{CH}_A\text{H}_B\text{-1}$ ), 1.53 (3H, s,  $\text{C3}''\text{-CH}_3\text{A}$ ), 1.40 (9H, s,  $\text{C}(\text{CH}_3)_3$ ), 1.38 (3H, s,  $\text{C3}''\text{-CH}_3\text{B}$ );  $^{13}\text{C}$  NMR (125 MHz,  $\text{CDCl}_3$ )  $\delta_{\text{C}}$  173.1, 170.9, 167.5, 155.4, 136.2, 134.6, 134.3, 129.7, 129.6, 128.79, 128.74, 128.71, 89.9 – 88.1 (m, **CHF-3**), 87.9 – 86.1 (m, **CHF-2**), 70.4, 67.7, 67.5, 64.8, 58.5, 55.7, 43.6, 37.6, 31.5, 29.7, 28.8, 28.4, 27.1 (tt,  $J$  22.0, 2.8 Hz, **CH<sub>2</sub>-1**), 26.8 ;  $^{19}\text{F}\{^1\text{H}\}$  NMR (470 MHz,  $\text{CDCl}_3$ )  $\delta_{\text{F}}$  -190.2 (2F, m, **CHF-2**), -209.7 (2F, m, **CHF-3**); (**ESI+**)  $m/z$   $[\text{M}+\text{Na}]^+$  calcd for  $\text{C}_{35}\text{H}_{41}\text{F}_4\text{N}_3\text{O}_6\text{S}^+$ : 730.2550 found 730.2531.

**Benzyl (2S, 5R, 6R)-6- [(N-((S)-2-(ammonium hydrochloride)-3-(4-(all *cis*-2,3,5,6 tetrafluorocyclohex-1-yl)phenyl)propanoyl)amino)]-3,3-dimethyl-7-oxo-4-thia-1-azabicyclo[3.2.0]heptane-2-carboxylate. (22).**

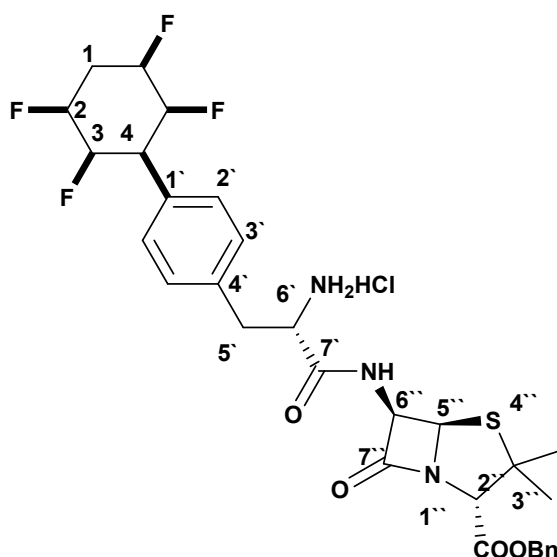

Boc-dipeptide **18** (20 mg, 0.028 mmol) was added to mixture of HCl 4M and 1,4-dioxane (1:1) (2 mL) at 0°C and then the mixture was stirred at room temperature for 1 h. The reaction was diluted with water (10 mL) and extracted into diethyl ether (2 × 15 mL). The organic layer was washed with water (20 mL) and the aqueous collected and evaporated under vacuum. The product was purified using a C-18 coated silica cartridge using methanol-water as the eluent (1:1) to afford hydrochloride salt **19** (15 mg, 83 %) as a colourless solid. **mp** decompose at 130 °C;  $[\alpha]_{\text{D}}^{20}$  +95.0 ( $c = 2 \times 10^{-4}$ , DMSO);  $^1\text{H}$  NMR (500 MHz,  $\text{CD}_3\text{COCD}_3$ )  $\delta_{\text{H}}$  7.47 - 7.28 (8H, m **Ar-H**), 7.15 (1H, dd,  $J$  8.1, 1.6 Hz, **Ar-H**), 5.27 – 5.16 (3H, m, **PhCH<sub>2</sub>, NH**), 5.27 – 4.82 (4H, m, **CHF-2, CHF-3**), 4.75 – 4.70 (1H, m, **H-6'**), 4.14 – 4.03 (1H, m, **H - 6''**), 3.83 - 3.64 (3H, m, **NH<sub>3</sub>**), 3.43 – 3.34 (1H, m, **H-5''**), 3.30 (2H, bs,

PhCH<sub>2</sub>-5`), 3.14 (1H, s, H-3``) 2.68 - 2.33 (3H, m, CH<sub>A</sub>H<sub>B</sub>-1, CH<sub>A</sub>H<sub>B</sub>-1, H-4 ), 1.57 (3H, s, C3``-CH<sub>3</sub>A), 1.18 - 1.14 (3H, m, C3``-CH<sub>3</sub>B); <sup>13</sup>C NMR (126 MHz, CD<sub>3</sub>COCD<sub>3</sub>) δ<sub>C</sub> 172.2, 169.0, 168.7, 137.6, 136.8, 135.1, 129.9, 128.9, 128.7, 128.4, 128.3, 90.7 – 89.0 (m, CHF-3), 88.1 – 86.3 (m, CHF-2), 74.1, 67.0, 66.5, 65.6, 44.8, 42.6, 41.5, 40.1, 29.4 – 28.4 (3C, CH<sub>2</sub>-1, CH<sub>3</sub>A, CH<sub>3</sub>B under the solvent peak) ; <sup>19</sup>F{<sup>1</sup>H} NMR (282 MHz, d6-Acetone) δ<sub>F</sub> -191.3 (2F, m, CHF-2), -210.9 (2F, m, CHF-3); HRMS (ESI+) *m/z* [M+H]<sup>+</sup> calcd for C<sub>30</sub>H<sub>34</sub>ClF<sub>4</sub>N<sub>3</sub>O<sub>4</sub>S<sup>+</sup>: 644.1895found 644.2524.

## Crystallographic Details for single X-ray structure of 11

### Data Collection

A colorless needle crystal of  $C_{15}H_{18}ClF_4NO_2$  having approximate dimensions of 0.300 x 0.030 x 0.010 mm was mounted in a loop. All measurements were made on a Rigaku XtaLAB P100 diffractometer using multi-layer mirror monochromated Cu-K $\alpha$  radiation.

The crystal-to-detector distance was 30.10 mm.

Cell constants and an orientation matrix for data collection corresponded to a primitive monoclinic cell with dimensions:

$$\begin{aligned} a &= 5.3827(19) \text{ \AA} \\ b &= 7.108(2) \text{ \AA} \quad \beta = 97.301(6)^\circ \\ c &= 20.990(7) \text{ \AA} \\ V &= 796.6(4) \text{ \AA}^3 \end{aligned}$$

For  $Z = 2$  and F.W. = 355.76, the calculated density is 1.483 g/cm<sup>3</sup>. Based on the reflection conditions of:

$$0k0: k = 2n$$

packing considerations, a statistical analysis of intensity distribution, and the successful solution and refinement of the structure, the space group was determined to be:

$$P2_1 (\#4)$$

The data were collected at a temperature of  $-100 \pm 1^\circ\text{C}$  to a maximum  $2\theta$  value of  $136.4^\circ$ . A total of 3983 oscillation images were collected. A sweep of data was done using  $\phi$  scans from  $0.0$  to  $200.0^\circ$  in  $0.50^\circ$  step, at  $\omega=0.0^\circ$  and  $\chi = 0.0^\circ$ . The exposure rate was 40.0 [sec./ $^\circ$ ]. The detector swing angle was  $-30.73^\circ$ . A second sweep was performed using  $\omega$  scans from  $-72.0$  to  $1.0^\circ$  in  $0.50^\circ$  step, at  $\chi=0.0^\circ$  and  $\phi = -90.0^\circ$ . The exposure rate was 40.0 [sec./ $^\circ$ ]. The detector swing angle was  $-30.73^\circ$ . Another sweep was performed using  $\omega$  scans from  $-113.0$  to  $-71.0^\circ$  in  $0.50^\circ$  step, at  $\chi=0.0^\circ$  and  $\phi = -45.0^\circ$ . The exposure rate was 40.0 [sec./ $^\circ$ ]. The detector swing angle was  $-30.73^\circ$ . Another sweep was performed using  $\phi$  scans from  $0.0$  to  $200.0^\circ$  in  $0.50^\circ$  step, at  $\omega=0.0^\circ$  and  $\chi = 0.0^\circ$ . The exposure rate was 40.0 [sec./ $^\circ$ ]. The detector swing angle

was  $-67.73^\circ$ . Another sweep was performed using  $\omega$  scans from  $-85.0$  to  $-13.0^\circ$  in  $0.50^\circ$  step, at  $\chi=0.0^\circ$  and  $\phi = 90.0^\circ$ . The exposure rate was  $40.0$  [sec./ $^\circ$ ]. The detector swing angle was  $-67.73^\circ$ . Another sweep was performed using  $\omega$  scans from  $-133.0$  to  $-93.0^\circ$  in  $0.50^\circ$  step, at  $\chi=0.0^\circ$  and  $\phi = 0.0^\circ$ . The exposure rate was  $40.0$  [sec./ $^\circ$ ]. The detector swing angle was  $-67.73^\circ$ . Another sweep was performed using  $\omega$  scans from  $-85.0$  to  $-12.0^\circ$  in  $0.50^\circ$  step, at  $\chi=0.0^\circ$  and  $\phi = -90.0^\circ$ . The exposure rate was  $40.0$  [sec./ $^\circ$ ]. The detector swing angle was  $-67.73^\circ$ . Another sweep was performed using  $\omega$  scans from  $-126.0$  to  $-86.0^\circ$  in  $0.50^\circ$  step, at  $\chi=0.0^\circ$  and  $\phi = -180.0^\circ$ . The exposure rate was  $40.0$  [sec./ $^\circ$ ]. The detector swing angle was  $-67.73^\circ$ . Another sweep was performed using  $\phi$  scans from  $0.0$  to  $200.0^\circ$  in  $0.50^\circ$  step, at  $\omega=-25.0^\circ$  and  $\chi = 0.0^\circ$ . The exposure rate was  $40.0$  [sec./ $^\circ$ ]. The detector swing angle was  $-110.73^\circ$ . Another sweep was performed using  $\omega$  scans from  $-128.0$  to  $-20.0^\circ$  in  $0.50^\circ$  step, at  $\chi=0.0^\circ$  and  $\phi = -135.0^\circ$ . The exposure rate was  $40.0$  [sec./ $^\circ$ ]. The detector swing angle was  $-110.73^\circ$ . Another sweep was performed using  $\omega$  scans from  $-128.0$  to  $-20.0^\circ$  in  $0.50^\circ$  step, at  $\chi=0.0^\circ$  and  $\phi = 45.0^\circ$ . The exposure rate was  $40.0$  [sec./ $^\circ$ ]. The detector swing angle was  $-110.73^\circ$ . Another sweep was performed using  $\omega$  scans from  $-115.0$  to  $-20.0^\circ$  in  $0.50^\circ$  step, at  $\chi=0.0^\circ$  and  $\phi = -45.0^\circ$ . The exposure rate was  $40.0$  [sec./ $^\circ$ ]. The detector swing angle was  $-110.73^\circ$ . Another sweep was performed using  $\omega$  scans from  $-113.0$  to  $-23.0^\circ$  in  $0.50^\circ$  step, at  $\chi=0.0^\circ$  and  $\phi = 135.0^\circ$ . The exposure rate was  $40.0$  [sec./ $^\circ$ ]. The detector swing angle was  $-110.73^\circ$ . Another sweep was performed using  $\omega$  scans from  $-141.0$  to  $-46.0^\circ$  in  $0.50^\circ$  step, at  $\chi=0.0^\circ$  and  $\phi = -90.0^\circ$ . The exposure rate was  $40.0$  [sec./ $^\circ$ ]. The detector swing angle was  $-110.73^\circ$ . Another sweep was performed using  $\omega$  scans from  $-141.0$  to  $-46.0^\circ$  in  $0.50^\circ$  step, at  $\chi=0.0^\circ$  and  $\phi = -180.0^\circ$ . The exposure rate was  $40.0$  [sec./ $^\circ$ ]. The detector swing angle was  $-110.73^\circ$ . Another sweep was performed using  $\omega$  scans from  $-141.0$  to  $-59.0^\circ$  in  $0.50^\circ$  step, at  $\chi=0.0^\circ$  and  $\phi = 90.0^\circ$ . The exposure rate was  $40.0$  [sec./ $^\circ$ ]. The detector swing angle was  $-110.73^\circ$ . Another sweep was performed using  $\omega$  scans from  $-141.0$  to  $-55.0^\circ$  in  $0.50^\circ$  step, at  $\chi=0.0^\circ$  and  $\phi = 0.0^\circ$ . The exposure rate was  $40.0$  [sec./ $^\circ$ ]. The detector swing angle was  $-110.73^\circ$ . Another sweep was performed using  $\omega$  scans from  $-141.0$  to  $-59.0^\circ$  in  $0.50^\circ$  step, at  $\chi=0.0^\circ$  and  $\phi = 45.0^\circ$ . The exposure rate was  $40.0$  [sec./ $^\circ$ ]. The detector swing angle was  $-110.73^\circ$ . Another sweep was performed using  $\omega$  scans from  $-141.0$  to  $-78.0^\circ$  in  $0.50^\circ$  step, at  $\chi=0.0^\circ$  and  $\phi = -45.0^\circ$ . The exposure rate was  $40.0$  [sec./ $^\circ$ ]. The detector swing angle was  $-110.73^\circ$ . Another sweep was performed using  $\omega$  scans from  $-140.0$  to  $-77.0^\circ$  in  $0.50^\circ$  step, at  $\chi=0.0^\circ$  and  $\phi = -135.0^\circ$ . The exposure rate was  $40.0$  [sec./ $^\circ$ ]. The detector swing angle was  $-110.73^\circ$ . Another sweep was performed using  $\omega$  scans from  $-140.0$  to  $-56.0^\circ$  in  $0.50^\circ$  step, at  $\chi=0.0^\circ$  and  $\phi = 135.0^\circ$ . The exposure rate was  $40.0$  [sec./ $^\circ$ ]. The detector swing angle was  $-110.73^\circ$ . Readout was performed in the  $0.172$  mm pixel mode.

## Data Reduction

Of the 7844 reflections were collected, where 2667 were unique ( $R_{\text{int}} = 0.1436$ ); equivalent reflections were merged. Data were collected and processed using CrystalClear (Rigaku).<sup>1</sup>

The linear absorption coefficient,  $\mu$ , for Cu-K $\alpha$  radiation is 26.058 cm<sup>-1</sup>. An empirical absorption correction was applied which resulted in transmission factors ranging from 0.214 to 0.974. The data were corrected for Lorentz and polarization effects. A correction for secondary extinction<sup>2</sup> was applied (coefficient = 0.038050).

## Structure Solution and Refinement

The structure was solved by direct methods<sup>3</sup> and expanded using Fourier techniques.

The crystal is a non-merohedral twin with twin law:

$$\begin{array}{ccc} -1.00000 & 0.00000 & 0.00000 \\ 0.00000 & -1.00000 & 0.00000 \\ 0.99100 & 0.00000 & 1.00000 \end{array}$$

Twin component #1 comprises 28.50% of the crystal.

The non-hydrogen atoms were refined anisotropically. Some hydrogen atoms were refined isotropically, and the rest were refined using the riding model. The final cycle of full-matrix least-squares refinement<sup>4</sup> on  $F^2$  was based on 2667 observed reflections and 222 variable parameters and converged (largest parameter shift was 0.00 times its esd) with unweighted and weighted agreement factors of:

$$R1 = \sum ||F_o| - |F_c|| / \sum |F_o| = 0.0966$$

$$wR2 = [ \sum ( w (F_o^2 - F_c^2)^2 ) / \sum w(F_o^2)^2 ]^{1/2} = 0.2711$$

The goodness of fit<sup>5</sup> was 0.98. Unit weights were used. The maximum and minimum peaks on the final difference Fourier map corresponded to 0.59 and -0.33 e<sup>-</sup>/Å<sup>3</sup>, respectively. The final Flack parameter<sup>6</sup> was -0.03(6), indicating that the present absolute structure is correct.<sup>7</sup>

Neutral atom scattering factors were taken from International Tables for Crystallography (IT), Vol. C, Table 6.1.1.4<sup>8</sup>. Anomalous dispersion effects were

included in  $F_{\text{calc}}^9$ ; the values for  $\Delta f'$  and  $\Delta f''$  were those of Creagh and McAuley<sup>10</sup>. The values for the mass attenuation coefficients are those of Creagh and Hubbell<sup>11</sup>. All calculations were performed using the CrystalStructure<sup>12</sup> crystallographic software package except for refinement, which was performed using SHELXL2013<sup>13</sup>.

### References for the above paragraph

- (1) CrystalClear: Data Collection and Processing Software, Rigaku Corporation (1998-2014). Tokyo 196-8666, Japan.
- (2) Larson, A.C. (1970), Crystallographic Computing, 291-294. F.R. Ahmed, ed. Munksgaard, Copenhagen (equation 22, with V replaced by the cell volume).
- (3) SIR2011: Burla, M. C., Caliandro, R., Camalli, M., Carrozzini, B., Cascarano, G. L., Giacovazzo, C., Mallamo, M., Mazzone, A., Polidori, G. and Spagna, R. (2012). J. Appl. Cryst. 45, 357-361.
- (4) Least Squares function minimized: (SHELXL2013)  
$$\sum w(F_o^2 - F_c^2)^2 \quad \text{where } w = \text{Least Squares weights.}$$
- (5) Goodness of fit is defined as:  
$$[\sum w(F_o^2 - F_c^2)^2 / (N_o - N_v)]^{1/2}$$

where:  $N_o$  = number of observations  
 $N_v$  = number of variables
- (6) Parsons, S. and Flack, H. (2004), Acta Cryst. A60, s61.
- (7) Flack, H.D. and Bernardinelli (2000), J. Appl. Cryst. 33, 114-1148.
- (8) International Tables for Crystallography, Vol.C (1992). Ed. A.J.C. Wilson, Kluwer Academic Publishers, Dordrecht, Netherlands, Table 6.1.1.4, pp. 572.
- (9) Ibers, J. A. & Hamilton, W. C.; Acta Crystallogr., 17, 781 (1964).
- (10) Creagh, D. C. & McAuley, W.J. ; "International Tables for Crystallography", Vol C, (A.J.C. Wilson, ed.), Kluwer Academic Publishers, Boston, Table 4.2.6.8, pages 219-222 (1992).
- (11) Creagh, D. C. & Hubbell, J.H.; "International Tables for Crystallography", Vol C, (A.J.C. Wilson, ed.), Kluwer Academic Publishers, Boston, Table 4.2.4.3, pages

200-206 (1992).

- (12) CrystalStructure 4.1: Crystal Structure Analysis Package, Rigaku Corporation (2000-2014). Tokyo 196-8666, Japan.
- (13) SHELXL2013: Sheldrick, G. M. (2008). Acta Cryst. A64, 112-122.

## EXPERIMENTAL DETAILS

### A. Crystal Data

|                      |                                                                                                         |
|----------------------|---------------------------------------------------------------------------------------------------------|
| Empirical Formula    | C <sub>15</sub> H <sub>18</sub> ClF <sub>4</sub> NO <sub>2</sub>                                        |
| Formula Weight       | 355.76                                                                                                  |
| Crystal Color, Habit | colorless, needle                                                                                       |
| Crystal Dimensions   | 0.300 X 0.030 X 0.010 mm                                                                                |
| Crystal System       | monoclinic                                                                                              |
| Lattice Type         | Primitive                                                                                               |
| Lattice Parameters   | a = 5.3827(19) Å<br>b = 7.108(2) Å<br>c = 20.990(7) Å<br>β = 97.301(6) °<br>V = 796.6(4) Å <sup>3</sup> |
| Space Group          | P2 <sub>1</sub> (#4)                                                                                    |
| Z value              | 2                                                                                                       |
| D <sub>calc</sub>    | 1.483 g/cm <sup>3</sup>                                                                                 |
| F <sub>000</sub>     | 368.00                                                                                                  |
| μ(CuKα)              | 26.058 cm <sup>-1</sup>                                                                                 |



## B. Intensity Measurements

|                                                       |                                                                                      |
|-------------------------------------------------------|--------------------------------------------------------------------------------------|
| Diffractometer                                        | XtaLAB P100                                                                          |
| Radiation                                             | CuK $\alpha$ ( $\lambda = 1.54187 \text{ \AA}$ )<br>multi-layer mirror monochromated |
| Voltage, Current                                      | 40kV, 30mA                                                                           |
| Temperature                                           | -100.0 $^{\circ}$ C                                                                  |
| Detector Aperture                                     | 83.8 x 33.5 mm                                                                       |
| Data Images                                           | 3983 exposures                                                                       |
| $\phi$ oscillation Range ( $\omega=0.0, \chi=0.0$ )   | 0.0 - 200.0 $^{\circ}$                                                               |
| Exposure Rate                                         | 40.0 sec./ $^{\circ}$                                                                |
| Detector Swing Angle                                  | -30.73 $^{\circ}$                                                                    |
| $\omega$ oscillation Range ( $\chi=0.0, \phi=-90.0$ ) | -72.0 - 1.0 $^{\circ}$                                                               |
| Exposure Rate                                         | 40.0 sec./ $^{\circ}$                                                                |
| Detector Swing Angle                                  | -30.73 $^{\circ}$                                                                    |
| $\omega$ oscillation Range ( $\chi=0.0, \phi=-45.0$ ) | -113.0 - -71.0 $^{\circ}$                                                            |
| Exposure Rate                                         | 40.0 sec./ $^{\circ}$                                                                |
| Detector Swing Angle                                  | -30.73 $^{\circ}$                                                                    |
| $\phi$ oscillation Range ( $\omega=0.0, \chi=0.0$ )   | 0.0 - 200.0 $^{\circ}$                                                               |
| Exposure Rate                                         | 40.0 sec./ $^{\circ}$                                                                |
| Detector Swing Angle                                  | -67.73 $^{\circ}$                                                                    |
| $\omega$ oscillation Range ( $\chi=0.0, \phi=90.0$ )  | -85.0 - -13.0 $^{\circ}$                                                             |
| Exposure Rate                                         | 40.0 sec./ $^{\circ}$                                                                |

|                                                        |                             |
|--------------------------------------------------------|-----------------------------|
| Detector Swing Angle                                   | -67.73 <sup>0</sup>         |
| $\omega$ oscillation Range ( $\chi=0.0, \phi=0.0$ )    | -133.0 - -93.0 <sup>0</sup> |
| Exposure Rate                                          | 40.0 sec./ <sup>0</sup>     |
| Detector Swing Angle                                   | -67.73 <sup>0</sup>         |
| $\omega$ oscillation Range ( $\chi=0.0, \phi=-90.0$ )  | -85.0 - -12.0 <sup>0</sup>  |
| Exposure Rate                                          | 40.0 sec./ <sup>0</sup>     |
| Detector Swing Angle                                   | -67.73 <sup>0</sup>         |
| $\omega$ oscillation Range ( $\chi=0.0, \phi=-180.0$ ) | -126.0 - -86.0 <sup>0</sup> |
| Exposure Rate                                          | 40.0 sec./ <sup>0</sup>     |
| Detector Swing Angle                                   | -67.73 <sup>0</sup>         |
| $\phi$ oscillation Range ( $\omega=-25.0, \chi=0.0$ )  | 0.0 - 200.0 <sup>0</sup>    |
| Exposure Rate                                          | 40.0 sec./ <sup>0</sup>     |
| Detector Swing Angle                                   | -110.73 <sup>0</sup>        |
| $\omega$ oscillation Range ( $\chi=0.0, \phi=-135.0$ ) | -128.0 - -20.0 <sup>0</sup> |
| Exposure Rate                                          | 40.0 sec./ <sup>0</sup>     |
| Detector Swing Angle                                   | -110.73 <sup>0</sup>        |
| $\omega$ oscillation Range ( $\chi=0.0, \phi=45.0$ )   | -128.0 - -20.0 <sup>0</sup> |
| Exposure Rate                                          | 40.0 sec./ <sup>0</sup>     |
| Detector Swing Angle                                   | -110.73 <sup>0</sup>        |
| $\omega$ oscillation Range ( $\chi=0.0, \phi=-45.0$ )  | -115.0 - -20.0 <sup>0</sup> |
| Exposure Rate                                          | 40.0 sec./ <sup>0</sup>     |

|                                                 |                             |
|-------------------------------------------------|-----------------------------|
| Detector Swing Angle                            | -110.73 <sup>0</sup>        |
| ω oscillation Range ( $\chi=0.0, \phi=135.0$ )  | -113.0 - -23.0 <sup>0</sup> |
| Exposure Rate                                   | 40.0 sec./ <sup>0</sup>     |
| Detector Swing Angle                            | -110.73 <sup>0</sup>        |
| ω oscillation Range ( $\chi=0.0, \phi=-90.0$ )  | -141.0 - -46.0 <sup>0</sup> |
| Exposure Rate                                   | 40.0 sec./ <sup>0</sup>     |
| Detector Swing Angle                            | -110.73 <sup>0</sup>        |
| ω oscillation Range ( $\chi=0.0, \phi=-180.0$ ) | -141.0 - -46.0 <sup>0</sup> |
| Exposure Rate                                   | 40.0 sec./ <sup>0</sup>     |
| Detector Swing Angle                            | -110.73 <sup>0</sup>        |
| ω oscillation Range ( $\chi=0.0, \phi=90.0$ )   | -141.0 - -59.0 <sup>0</sup> |
| Exposure Rate                                   | 40.0 sec./ <sup>0</sup>     |
| Detector Swing Angle                            | -110.73 <sup>0</sup>        |
| ω oscillation Range ( $\chi=0.0, \phi=0.0$ )    | -141.0 - -55.0 <sup>0</sup> |
| Exposure Rate                                   | 40.0 sec./ <sup>0</sup>     |
| Detector Swing Angle                            | -110.73 <sup>0</sup>        |
| ω oscillation Range ( $\chi=0.0, \phi=45.0$ )   | -141.0 - -59.0 <sup>0</sup> |
| Exposure Rate                                   | 40.0 sec./ <sup>0</sup>     |
| Detector Swing Angle                            | -110.73 <sup>0</sup>        |
| ω oscillation Range ( $\chi=0.0, \phi=-45.0$ )  | -141.0 - -78.0 <sup>0</sup> |
| Exposure Rate                                   | 40.0 sec./ <sup>0</sup>     |
| Detector Swing Angle                            | -110.73 <sup>0</sup>        |

|                                                        |                                                                                                                              |
|--------------------------------------------------------|------------------------------------------------------------------------------------------------------------------------------|
| $\omega$ oscillation Range ( $\chi=0.0, \phi=-135.0$ ) | -140.0 - -77.0 $^{\circ}$                                                                                                    |
| Exposure Rate                                          | 40.0 sec./ $^{\circ}$                                                                                                        |
| Detector Swing Angle                                   | -110.73 $^{\circ}$                                                                                                           |
| $\omega$ oscillation Range ( $\chi=0.0, \phi=135.0$ )  | -140.0 - -56.0 $^{\circ}$                                                                                                    |
| Exposure Rate                                          | 40.0 sec./ $^{\circ}$                                                                                                        |
| Detector Swing Angle                                   | -110.73 $^{\circ}$                                                                                                           |
| $\omega$ oscillation Range ( $\chi=0.0, \phi=0.0$ )    | -91.0 - -90.5 $^{\circ}$                                                                                                     |
| Exposure Rate                                          | 4.0 sec./ $^{\circ}$                                                                                                         |
| Detector Swing Angle                                   | -30.73 $^{\circ}$                                                                                                            |
| Detector Position                                      | 90.10 mm                                                                                                                     |
| Pixel Size                                             | 0.172 mm                                                                                                                     |
| $2\theta_{\max}$                                       | 136.4 $^{\circ}$                                                                                                             |
| No. of Reflections Measured                            | Total: 7844<br>Unique: 2667 ( $R_{\text{int}} = 0.1436$ )                                                                    |
| Parsons quotients (Flack x parameter):                 | 359                                                                                                                          |
| Corrections                                            | Lorentz-polarization<br>Absorption<br>(trans. factors: 0.214 - 0.974)<br>Secondary Extinction<br>(coefficient: 3.80500e-002) |

### C. Structure Solution and Refinement

|                                            |                                                                                                                 |
|--------------------------------------------|-----------------------------------------------------------------------------------------------------------------|
| Structure Solution                         | Direct Methods (SIR2011)                                                                                        |
| Refinement                                 | Full-matrix least-squares on F <sup>2</sup>                                                                     |
| Function Minimized                         | $\Sigma w (F_o^2 - F_c^2)^2$                                                                                    |
| Least Squares Weights                      | $w = 1 / [ \sigma^2(F_o^2) + (0.1611 \cdot P)^2 + 0.0000 \cdot P ]$<br>where $P = (Max(F_o^2, 0) + 2F_c^2) / 3$ |
| $2\theta_{max}$ cutoff                     | 136.4°                                                                                                          |
| Anomalous Dispersion                       | All non-hydrogen atoms                                                                                          |
| No. Observations (All reflections)         | 2667                                                                                                            |
| No. Variables                              | 222                                                                                                             |
| Reflection/Parameter Ratio                 | 12.01                                                                                                           |
| Residuals: R1 ( $I > 2.00\sigma(I)$ )      | 0.0966                                                                                                          |
| Residuals: R (All reflections)             | 0.1193                                                                                                          |
| Residuals: wR2 (All reflections)           | 0.2711                                                                                                          |
| Goodness of Fit Indicator                  | 0.978                                                                                                           |
| Flack parameter (Parsons' quotients = 359) | -0.03(6)                                                                                                        |
| Max Shift/Error in Final Cycle             | 0.000                                                                                                           |
| Maximum peak in Final Diff. Map            | 0.59 e <sup>-</sup> /Å <sup>3</sup>                                                                             |
| Minimum peak in Final Diff. Map            | -0.33 e <sup>-</sup> /Å <sup>3</sup>                                                                            |

Table 1. Atomic coordinates and  $B_{\text{iso}}/B_{\text{eq}}$

| atom | x          | y           | z          | $B_{\text{eq}}$ |
|------|------------|-------------|------------|-----------------|
| Cl1  | 0.7416(7)  | 0.4443(6)   | 0.9258(2)  | 6.55(9)         |
| F8   | 0.5256(17) | 0.6947(12)  | 0.6644(5)  | 6.09(18)        |
| F9   | 0.9512(19) | 0.8566(13)  | 0.6395(6)  | 7.4(2)          |
| F11  | 0.6905(19) | 0.3659(16)  | 0.4920(5)  | 7.2(2)          |
| F12  | 0.3734(15) | 0.4077(15)  | 0.5814(4)  | 6.3(2)          |
| O15  | 0.5873(19) | -0.0674(18) | 0.9385(6)  | 6.9(2)          |
| O16  | 0.336(2)   | -0.2767(19) | 0.8827(7)  | 7.2(3)          |
| N17  | 0.228(2)   | 0.1933(18)  | 0.9441(7)  | 5.9(2)          |
| C1   | 0.522(2)   | 0.303(2)    | 0.7156(9)  | 5.5(3)          |
| C2   | 0.398(3)   | 0.415(2)    | 0.7561(8)  | 6.1(3)          |
| C3   | 0.228(3)   | 0.332(2)    | 0.7949(7)  | 5.6(3)          |
| C4   | 0.203(3)   | 0.138(2)    | 0.7964(8)  | 5.6(3)          |
| C5   | 0.333(3)   | 0.029(2)    | 0.7567(10) | 6.9(4)          |
| C6   | 0.488(3)   | 0.110(2)    | 0.7161(10) | 6.2(3)          |
| C7   | 0.697(3)   | 0.3812(19)  | 0.6689(8)  | 5.3(3)          |
| C8   | 0.743(3)   | 0.593(2)    | 0.6780(8)  | 5.5(3)          |
| C9   | 0.921(3)   | 0.660(2)    | 0.6314(9)  | 6.0(3)          |
| C10  | 0.830(3)   | 0.614(3)    | 0.5623(10) | 6.9(4)          |
| C11  | 0.788(3)   | 0.404(2)    | 0.5560(8)  | 5.5(3)          |
| C12  | 0.611(3)   | 0.331(2)    | 0.6011(8)  | 6.0(3)          |
| C13  | 0.028(3)   | 0.052(2)    | 0.8403(7)  | 5.5(3)          |
| C14  | 0.154(3)   | 0.010(2)    | 0.9093(8)  | 5.7(3)          |
| C15  | 0.389(3)   | -0.1135(19) | 0.9114(9)  | 6.2(3)          |

$$B_{\text{eq}} = 8/3 \pi^2 (U_{11}(aa^*)^2 + U_{22}(bb^*)^2 + U_{33}(cc^*)^2 + 2U_{12}(aa^*bb^*)\cos \gamma + 2U_{13}(aa^*cc^*)\cos \beta + 2U_{23}(bb^*cc^*)\cos \alpha)$$

Table 2. Atomic coordinates and  $B_{\text{iso}}$  involving hydrogen atoms

| atom | x        | y        | z         | $B_{\text{iso}}$ |
|------|----------|----------|-----------|------------------|
| H16  | 0.46(4)  | -0.38(3) | 0.888(12) | 10.8258          |
| H17A | 0.27(5)  | 0.15(3)  | 0.988(4)  | 8.8163           |
| H17B | 0.11(3)  | 0.30(2)  | 0.933(10) | 8.8163           |
| H17C | 0.38(2)  | 0.24(3)  | 0.930(10) | 8.8163           |
| H2   | 0.42637  | 0.54665  | 0.75783   | 7.368            |
| H3   | 0.13214  | 0.40909  | 0.81956   | 6.691            |
| H5   | 0.31536  | -0.10441 | 0.75724   | 8.291            |
| H6   | 0.57142  | 0.03250  | 0.68854   | 7.398            |
| H7   | 0.86264  | 0.31831  | 0.68033   | 6.404            |
| H8   | 0.81885  | 0.61802  | 0.72320   | 6.588            |
| H9   | 1.08745  | 0.59851  | 0.64333   | 7.177            |
| H10A | 0.95597  | 0.65384  | 0.53453   | 8.330            |
| H10B | 0.67170  | 0.68107  | 0.54833   | 8.330            |
| H11  | 0.95327  | 0.33873  | 0.56586   | 6.642            |
| H12  | 0.60066  | 0.19090  | 0.59731   | 7.220            |
| H13A | -0.04170 | -0.06680 | 0.82080   | 6.658            |
| H13B | -0.11395 | 0.13911  | 0.84285   | 6.658            |
| H14  | 0.03015  | -0.05643 | 0.93298   | 6.786            |

Table 3. Anisotropic displacement parameters

| atom | U <sub>11</sub> | U <sub>22</sub> | U <sub>33</sub> | U <sub>12</sub> | U <sub>13</sub> | U <sub>23</sub> |
|------|-----------------|-----------------|-----------------|-----------------|-----------------|-----------------|
| Cl1  | 0.071(2)        | 0.0630(18)      | 0.115(3)        | 0.0164(17)      | 0.0100(18)      | -0.000(2)       |
| F8   | 0.060(5)        | 0.056(5)        | 0.117(6)        | 0.004(4)        | 0.021(4)        | 0.001(4)        |
| F9   | 0.076(6)        | 0.070(6)        | 0.135(8)        | -0.020(5)       | 0.021(5)        | -0.010(5)       |
| F11  | 0.073(6)        | 0.109(8)        | 0.095(6)        | -0.011(5)       | 0.017(5)        | -0.008(5)       |
| F12  | 0.054(4)        | 0.087(6)        | 0.100(6)        | -0.004(4)       | 0.011(4)        | -0.013(5)       |
| O15  | 0.057(6)        | 0.060(5)        | 0.148(9)        | -0.005(6)       | 0.023(6)        | 0.002(7)        |
| O16  | 0.072(7)        | 0.069(7)        | 0.130(9)        | 0.009(6)        | 0.002(6)        | -0.001(6)       |
| N17  | 0.067(7)        | 0.058(6)        | 0.096(8)        | 0.007(6)        | 0.004(7)        | -0.010(6)       |
| C1   | 0.046(7)        | 0.050(7)        | 0.114(11)       | 0.001(5)        | 0.010(7)        | 0.000(7)        |
| C2   | 0.072(9)        | 0.049(8)        | 0.112(11)       | 0.009(7)        | 0.011(8)        | 0.002(7)        |
| C3   | 0.063(8)        | 0.058(8)        | 0.092(9)        | -0.005(6)       | 0.013(7)        | 0.002(7)        |
| C4   | 0.057(8)        | 0.055(7)        | 0.103(10)       | 0.011(7)        | 0.015(7)        | 0.004(7)        |
| C5   | 0.062(9)        | 0.049(8)        | 0.153(16)       | -0.011(7)       | 0.019(9)        | -0.001(9)       |
| C6   | 0.062(8)        | 0.058(8)        | 0.116(12)       | 0.001(7)        | 0.017(8)        | -0.014(8)       |
| C7   | 0.054(8)        | 0.049(7)        | 0.101(10)       | 0.004(6)        | 0.010(6)        | -0.003(6)       |
| C8   | 0.060(8)        | 0.066(9)        | 0.083(9)        | -0.006(7)       | 0.010(6)        | -0.012(6)       |
| C9   | 0.059(8)        | 0.058(8)        | 0.112(11)       | -0.008(6)       | 0.019(8)        | -0.010(7)       |
| C10  | 0.040(8)        | 0.086(12)       | 0.138(15)       | 0.004(7)        | 0.017(8)        | 0.007(10)       |
| C11  | 0.064(8)        | 0.058(9)        | 0.091(8)        | -0.002(7)       | 0.020(6)        | -0.005(6)       |
| C12  | 0.057(8)        | 0.075(10)       | 0.099(10)       | 0.008(7)        | 0.019(7)        | -0.007(8)       |
| C13  | 0.061(8)        | 0.066(9)        | 0.082(9)        | -0.003(6)       | 0.003(7)        | 0.001(7)        |
| C14  | 0.064(8)        | 0.063(7)        | 0.089(8)        | -0.002(7)       | 0.011(7)        | -0.003(7)       |
| C15  | 0.051(8)        | 0.047(7)        | 0.141(13)       | -0.010(6)       | 0.018(8)        | 0.005(7)        |

The general temperature factor expression:  $\exp(-2\pi^2(a^2U_{11}h^2 + b^2U_{22}k^2 + c^2U_{33}l^2 + 2a*b*U_{12}hk + 2a*c*U_{13}hl + 2b*c*U_{23}kl))$



#### Table 4. Fragment Analysis

fragment: 1  
Cl(1)

fragment: 2

|       |       |       |       |       |
|-------|-------|-------|-------|-------|
| F(8)  | F(9)  | F(11) | F(12) | O(15) |
| O(16) | N(17) | C(1)  | C(2)  | C(3)  |
| C(4)  | C(5)  | C(6)  | C(7)  | C(8)  |
| C(9)  | C(10) | C(11) | C(12) | C(13) |
| C(14) | C(15) |       |       |       |

Table 5. Bond lengths (Å)

| atom | atom | distance  | atom | atom | distance  |
|------|------|-----------|------|------|-----------|
| F8   | C8   | 1.376(18) | F9   | C9   | 1.415(18) |
| F11  | C11  | 1.406(18) | F12  | C12  | 1.404(17) |
| O15  | C15  | 1.191(19) | O16  | C15  | 1.32(2)   |
| N17  | C14  | 1.52(2)   | C1   | C2   | 1.39(2)   |
| C1   | C6   | 1.38(2)   | C1   | C7   | 1.55(2)   |
| C2   | C3   | 1.43(2)   | C3   | C4   | 1.39(2)   |
| C4   | C5   | 1.39(3)   | C4   | C13  | 1.53(2)   |
| C5   | C6   | 1.39(3)   | C7   | C8   | 1.53(2)   |
| C7   | C12  | 1.48(2)   | C8   | C9   | 1.53(2)   |
| C9   | C10  | 1.51(3)   | C10  | C11  | 1.51(3)   |
| C11  | C12  | 1.52(2)   | C13  | C14  | 1.55(2)   |
| C14  | C15  | 1.53(2)   |      |      |           |

Table 6. Bond lengths involving hydrogens (Å)

| atom | atom | distance | atom | atom | distance |
|------|------|----------|------|------|----------|
| O16  | H16  | 1.0(2)   | N17  | H17A | 0.99(11) |
| N17  | H17B | 0.98(16) | N17  | H17C | 0.98(17) |
| C2   | H2   | 0.950    | C3   | H3   | 0.950    |
| C5   | H5   | 0.950    | C6   | H6   | 0.950    |
| C7   | H7   | 1.000    | C8   | H8   | 1.000    |
| C9   | H9   | 1.000    | C10  | H10A | 0.990    |
| C10  | H10B | 0.990    | C11  | H11  | 1.000    |
| C12  | H12  | 1.000    | C13  | H13A | 0.990    |
| C13  | H13B | 0.990    | C14  | H14  | 1.000    |

Table 7. Bond angles (°)

| atom | atom | atom | angle     | atom | atom | atom | angle     |
|------|------|------|-----------|------|------|------|-----------|
| C2   | C1   | C6   | 119.1(16) | C2   | C1   | C7   | 124.0(13) |
| C6   | C1   | C7   | 116.9(15) | C1   | C2   | C3   | 120.3(14) |
| C2   | C3   | C4   | 119.7(15) | C3   | C4   | C5   | 118.9(15) |
| C3   | C4   | C13  | 118.7(14) | C5   | C4   | C13  | 122.3(14) |
| C4   | C5   | C6   | 121.5(15) | C1   | C6   | C5   | 120.4(17) |
| C1   | C7   | C8   | 112.1(13) | C1   | C7   | C12  | 112.5(12) |
| C8   | C7   | C12  | 112.5(13) | F8   | C8   | C7   | 111.8(12) |
| F8   | C8   | C9   | 106.6(12) | C7   | C8   | C9   | 109.4(13) |
| F9   | C9   | C8   | 107.7(13) | F9   | C9   | C10  | 110.6(14) |
| C8   | C9   | C10  | 113.2(13) | C9   | C10  | C11  | 109.1(16) |
| F11  | C11  | C10  | 107.9(13) | F11  | C11  | C12  | 109.9(12) |
| C10  | C11  | C12  | 112.4(14) | F12  | C12  | C7   | 110.5(13) |
| F12  | C12  | C11  | 107.8(12) | C7   | C12  | C11  | 111.8(13) |
| C4   | C13  | C14  | 114.2(13) | N17  | C14  | C13  | 110.0(12) |
| N17  | C14  | C15  | 108.1(12) | C13  | C14  | C15  | 113.6(14) |
| O15  | C15  | O16  | 126.1(15) | O15  | C15  | C14  | 122.8(14) |
| O16  | C15  | C14  | 111.0(13) |      |      |      |           |

Table 8. Bond angles involving hydrogens (°)

| atom | atom | atom | angle   | atom | atom | atom | angle   |
|------|------|------|---------|------|------|------|---------|
| H16  | O16  | C15  | 118(13) | H17A | N17  | H17B | 123(18) |
| H17A | N17  | H17C | 109(18) | H17A | N17  | C14  | 100(12) |
| H17B | N17  | H17C | 99(17)  | H17B | N17  | C14  | 115(10) |
| H17C | N17  | C14  | 110(13) | C1   | C2   | H2   | 119.9   |
| C3   | C2   | H2   | 119.9   | C2   | C3   | H3   | 120.2   |
| C4   | C3   | H3   | 120.2   | C4   | C5   | H5   | 119.3   |
| C6   | C5   | H5   | 119.3   | C1   | C6   | H6   | 119.8   |
| C5   | C6   | H6   | 119.8   | C1   | C7   | H7   | 106.4   |
| C8   | C7   | H7   | 106.4   | C12  | C7   | H7   | 106.4   |
| F8   | C8   | H8   | 109.7   | C7   | C8   | H8   | 109.7   |
| C9   | C8   | H8   | 109.7   | F9   | C9   | H9   | 108.4   |
| C8   | C9   | H9   | 108.4   | C10  | C9   | H9   | 108.4   |
| C9   | C10  | H10A | 109.9   | C9   | C10  | H10B | 109.9   |
| C11  | C10  | H10A | 109.9   | C11  | C10  | H10B | 109.9   |
| H10A | C10  | H10B | 108.3   | F11  | C11  | H11  | 108.8   |
| C10  | C11  | H11  | 108.8   | C12  | C11  | H11  | 108.8   |
| F12  | C12  | H12  | 108.9   | C7   | C12  | H12  | 108.9   |
| C11  | C12  | H12  | 108.9   | C4   | C13  | H13A | 108.7   |
| C4   | C13  | H13B | 108.7   | C14  | C13  | H13A | 108.7   |
| C14  | C13  | H13B | 108.7   | H13A | C13  | H13B | 107.6   |
| N17  | C14  | H14  | 108.4   | C13  | C14  | H14  | 108.4   |
| C15  | C14  | H14  | 108.4   |      |      |      |         |

Table 9. Torsion Angles( $^{\circ}$ )(Those having bond angles  $> 160$  or  $< 20$  degrees are excluded.)

| atom1 | atom2 | atom3 | atom4 | angle      | atom1 | atom2 | atom3 | atom4 | angle      |
|-------|-------|-------|-------|------------|-------|-------|-------|-------|------------|
| C2    | C1    | C6    | C5    | -0(2)      | C6    | C1    | C2    | C3    | -3(2)      |
| C2    | C1    | C7    | C8    | 7.1(19)    | C2    | C1    | C7    | C12   | -120.8(14) |
| C7    | C1    | C2    | C3    | 176.1(12)  | C6    | C1    | C7    | C8    | -173.6(12) |
| C6    | C1    | C7    | C12   | 58.5(16)   | C7    | C1    | C6    | C5    | -179.7(12) |
| C1    | C2    | C3    | C4    | 6(2)       | C2    | C3    | C4    | C5    | -4(2)      |
| C2    | C3    | C4    | C13   | 177.5(12)  | C3    | C4    | C5    | C6    | 0(2)       |
| C3    | C4    | C13   | C14   | -88.8(15)  | C5    | C4    | C13   | C14   | 92.8(17)   |
| C13   | C4    | C5    | C6    | 178.9(12)  | C4    | C5    | C6    | C1    | 2(2)       |
| C1    | C7    | C8    | F8    | -63.3(15)  | C1    | C7    | C8    | C9    | 178.8(10)  |
| C1    | C7    | C12   | F12   | 61.6(16)   | C1    | C7    | C12   | C11   | -178.4(10) |
| C8    | C7    | C12   | F12   | -66.1(16)  | C8    | C7    | C12   | C11   | 53.9(16)   |
| C12   | C7    | C8    | F8    | 64.6(17)   | C12   | C7    | C8    | C9    | -53.3(15)  |
| F8    | C8    | C9    | F9    | 56.7(14)   | F8    | C8    | C9    | C10   | -65.8(15)  |
| C7    | C8    | C9    | F9    | 177.8(11)  | C7    | C8    | C9    | C10   | 55.2(15)   |
| F9    | C9    | C10   | C11   | -177.3(11) | C8    | C9    | C10   | C11   | -56.5(16)  |
| C9    | C10   | C11   | F11   | 176.7(12)  | C9    | C10   | C11   | C12   | 55.3(15)   |
| F11   | C11   | C12   | F12   | -54.0(16)  | F11   | C11   | C12   | C7    | -175.6(11) |
| C10   | C11   | C12   | F12   | 66.3(15)   | C10   | C11   | C12   | C7    | -55.3(16)  |
| C4    | C13   | C14   | N17   | 66.9(16)   | C4    | C13   | C14   | C15   | -54.4(16)  |
| N17   | C14   | C15   | O15   | 2(2)       | N17   | C14   | C15   | O16   | 179.0(12)  |
| C13   | C14   | C15   | O15   | 124.6(17)  | C13   | C14   | C15   | O16   | -58.7(18)  |

Table 10. Possible hydrogen bonds

| Donor | H    | Acceptor         | D...A     | D-H      | H...A    | D-H...A          |
|-------|------|------------------|-----------|----------|----------|------------------|
| O16   | H16  | Cl1 <sup>1</sup> | 3.004(13) | 1.0(2)   | 2.1(2)   | 163(21)          |
| N17   | H17A | Cl1 <sup>2</sup> | 3.240(15) | 0.99(11) | 2.31(15) | 158(17)          |
| N17   | H17A | O15              | 2.690(18) | 0.99(11) | 2.6(2)   | 84(12) intramol. |
| N17   | H17B | Cl1 <sup>3</sup> | 3.153(14) | 0.98(16) | 2.25(18) | 154(15)          |
| N17   | H17C | O15              | 2.690(18) | 0.98(17) | 2.5(2)   | 92(15) intramol. |

Symmetry Operators:

- (1) X,Y-1,Z  
 (2) -X+1,Y+1/2-1,-Z+2  
 (3) X-1,Y,Z

Table 11. Intramolecular contacts less than 3.60 Å

| atom | atom | distance  | atom | atom | distance  |
|------|------|-----------|------|------|-----------|
| F8   | F9   | 2.673(14) | F8   | F12  | 2.739(13) |
| F8   | C1   | 2.986(17) | F8   | C2   | 2.912(19) |
| F8   | C10  | 2.92(2)   | F8   | C11  | 3.501(19) |
| F8   | C12  | 2.969(19) | F11  | F12  | 2.710(14) |
| F12  | C1   | 2.925(19) | F12  | C6   | 3.52(2)   |
| F12  | C8   | 2.962(17) | F12  | C9   | 3.495(18) |
| F12  | C10  | 2.932(19) | O15  | N17  | 2.690(18) |
| O15  | C13  | 3.530(18) | O16  | C4   | 3.49(2)   |
| O16  | C5   | 3.42(2)   | O16  | C13  | 2.94(2)   |
| N17  | C3   | 3.28(2)   | N17  | C4   | 3.11(2)   |
| C1   | C4   | 2.82(2)   | C2   | C5   | 2.77(2)   |
| C2   | C8   | 2.92(2)   | C3   | C6   | 2.79(2)   |
| C3   | C14  | 3.38(2)   | C4   | C15  | 3.07(2)   |
| C5   | C14  | 3.46(3)   | C5   | C15  | 3.38(3)   |
| C6   | C12  | 3.02(3)   | C7   | C10  | 2.94(3)   |
| C8   | C11  | 2.93(2)   | C9   | C12  | 2.90(2)   |



Table 12. Intramolecular contacts less than 3.60 Å involving hydrogens

| atom | atom | distance | atom | atom | distance |
|------|------|----------|------|------|----------|
| F8   | H2   | 2.347    | F8   | H7   | 3.226    |
| F8   | H9   | 3.186    | F8   | H10B | 2.654    |
| F9   | H8   | 2.605    | F9   | H10A | 2.636    |
| F9   | H10B | 2.598    | F11  | H10A | 2.589    |
| F11  | H10B | 2.541    | F11  | H12  | 2.635    |
| F12  | H6   | 3.563    | F12  | H7   | 3.203    |
| F12  | H10B | 2.668    | F12  | H11  | 3.217    |
| O15  | H16  | 2.5(2)   | O15  | H17A | 2.6(2)   |
| O15  | H17C | 2.5(2)   | O15  | H14  | 2.987    |
| O16  | H5   | 2.894    | O16  | H13A | 2.714    |
| O16  | H14  | 2.590    | H16  | C14  | 3.3(2)   |
| H16  | H5   | 3.368    | H16  | H14  | 3.471    |
| N17  | H3   | 3.019    | N17  | H13A | 3.358    |
| N17  | H13B | 2.658    | H17A | C13  | 3.28(11) |
| H17A | C15  | 2.58(18) | H17A | H13B | 3.460    |
| H17A | H14  | 2.163    | H17B | C3   | 3.0(2)   |
| H17B | C4   | 3.2(2)   | H17B | C13  | 2.62(18) |
| H17B | C15  | 3.34(16) | H17B | H3   | 2.520    |
| H17B | H13A | 3.538    | H17B | H13B | 2.408    |
| H17B | H14  | 2.568    | H17C | C3   | 2.9(2)   |
| H17C | C4   | 2.9(2)   | H17C | C13  | 2.85(18) |
| H17C | C15  | 2.6(2)   | H17C | H3   | 2.775    |

|      |      |       |      |      |       |
|------|------|-------|------|------|-------|
| H17C | H13B | 3.121 | H17C | H14  | 2.861 |
| C1   | H3   | 3.302 | C1   | H5   | 3.261 |
| C1   | H8   | 2.743 | C1   | H12  | 2.692 |
| C2   | H6   | 3.256 | C2   | H7   | 3.204 |
| C2   | H8   | 2.846 | C3   | H5   | 3.248 |
| C3   | H13A | 3.259 | C3   | H13B | 2.596 |
| C4   | H2   | 3.286 | C4   | H6   | 3.281 |
| C4   | H14  | 3.415 | C5   | H3   | 3.254 |
| C5   | H13A | 2.651 | C5   | H13B | 3.283 |
| C6   | H2   | 3.254 | C6   | H7   | 2.683 |
| C6   | H12  | 2.701 | C7   | H2   | 2.771 |
| C7   | H6   | 2.615 | C7   | H9   | 2.717 |
| C7   | H10B | 3.298 | C7   | H11  | 2.726 |
| C8   | H2   | 2.558 | C8   | H10A | 3.384 |
| C8   | H10B | 2.773 | C8   | H11  | 3.280 |

Table 12. Intramolecular contacts less than 3.60 Å involving hydrogens (continued)

| atom | atom | distance | atom | atom | distance |
|------|------|----------|------|------|----------|
| C8   | H12  | 3.359    | C9   | H7   | 2.671    |
| C9   | H11  | 2.683    | C10  | H7   | 3.235    |
| C10  | H8   | 3.386    | C10  | H12  | 3.365    |
| C11  | H7   | 2.661    | C11  | H9   | 2.666    |
| C12  | H6   | 2.831    | C12  | H8   | 3.354    |
| C12  | H9   | 3.225    | C12  | H10A | 3.366    |
| C12  | H10B | 2.760    | C13  | H3   | 2.649    |
| C13  | H5   | 2.712    | C14  | H3   | 3.399    |
| C14  | H5   | 3.507    | C15  | H5   | 3.211    |
| C15  | H13A | 2.825    | C15  | H13B | 3.410    |
| H2   | H3   | 2.380    | H2   | H7   | 3.430    |
| H2   | H8   | 2.375    | H3   | H13A | 3.511    |
| H3   | H13B | 2.417    | H5   | H6   | 2.331    |
| H5   | H13A | 2.489    | H5   | H13B | 3.553    |
| H6   | H7   | 2.585    | H6   | H12  | 2.244    |
| H7   | H8   | 2.336    | H7   | H9   | 2.505    |
| H7   | H11  | 2.516    | H7   | H12  | 2.285    |
| H8   | H9   | 2.353    | H9   | H10A | 2.337    |
| H9   | H10B | 2.863    | H9   | H11  | 2.505    |
| H10A | H11  | 2.335    | H10B | H11  | 2.866    |
| H11  | H12  | 2.337    | H13A | H14  | 2.338    |
| H13B | H14  | 2.396    |      |      |          |



Table 13. Intermolecular contacts less than 3.60 Å

| atom | atom              | distance  | atom | atom              | distance  |
|------|-------------------|-----------|------|-------------------|-----------|
| Cl1  | O15 <sup>1</sup>  | 3.586(13) | Cl1  | O15 <sup>2</sup>  | 3.539(14) |
| Cl1  | O16 <sup>1</sup>  | 3.004(13) | Cl1  | N17               | 3.351(14) |
| Cl1  | N17 <sup>3</sup>  | 3.153(14) | Cl1  | N17 <sup>2</sup>  | 3.240(15) |
| Cl1  | C14 <sup>2</sup>  | 3.467(16) | Cl1  | C15 <sup>2</sup>  | 3.60(2)   |
| F8   | F9 <sup>4</sup>   | 3.278(13) | F8   | F11 <sup>5</sup>  | 3.554(13) |
| F8   | C5 <sup>1</sup>   | 3.31(2)   | F8   | C6 <sup>1</sup>   | 3.159(18) |
| F8   | C9 <sup>4</sup>   | 3.250(18) | F9   | F8 <sup>3</sup>   | 3.278(13) |
| F9   | F11 <sup>6</sup>  | 3.563(16) | F9   | C5 <sup>7</sup>   | 3.24(2)   |
| F11  | F8 <sup>8</sup>   | 3.554(13) | F11  | F9 <sup>9</sup>   | 3.563(16) |
| F11  | C10 <sup>8</sup>  | 3.40(2)   | F11  | C10 <sup>9</sup>  | 3.45(2)   |
| F12  | C9 <sup>4</sup>   | 3.300(19) | F12  | C10 <sup>4</sup>  | 3.248(18) |
| F12  | C11 <sup>4</sup>  | 3.126(17) | O15  | Cl1 <sup>10</sup> | 3.586(13) |
| O15  | Cl1 <sup>11</sup> | 3.539(14) | O15  | N17 <sup>11</sup> | 3.053(18) |
| O15  | C13 <sup>3</sup>  | 3.44(2)   | O15  | C14 <sup>3</sup>  | 3.24(2)   |
| O16  | Cl1 <sup>10</sup> | 3.004(13) | O16  | C2 <sup>10</sup>  | 3.49(2)   |
| O16  | C3 <sup>10</sup>  | 3.35(2)   | N17  | Cl1 <sup>4</sup>  | 3.153(14) |
| N17  | Cl1               | 3.351(14) | N17  | Cl1 <sup>11</sup> | 3.240(15) |
| N17  | O15 <sup>2</sup>  | 3.053(18) | C2   | O16 <sup>1</sup>  | 3.49(2)   |
| C3   | O16 <sup>1</sup>  | 3.35(2)   | C5   | F8 <sup>10</sup>  | 3.31(2)   |
| C5   | F9 <sup>12</sup>  | 3.24(2)   | C6   | F8 <sup>10</sup>  | 3.159(18) |
| C9   | F8 <sup>3</sup>   | 3.250(18) | C9   | F12 <sup>3</sup>  | 3.300(19) |
| C10  | F11 <sup>5</sup>  | 3.40(2)   | C10  | F11 <sup>6</sup>  | 3.45(2)   |

|     |                  |           |     |                   |           |
|-----|------------------|-----------|-----|-------------------|-----------|
| C10 | F12 <sup>3</sup> | 3.248(18) | C11 | F12 <sup>3</sup>  | 3.126(17) |
| C13 | O15 <sup>4</sup> | 3.44(2)   | C14 | CI1 <sup>11</sup> | 3.467(16) |
| C14 | O15 <sup>4</sup> | 3.24(2)   | C15 | CI1 <sup>11</sup> | 3.60(2)   |

Symmetry Operators:

- |                        |                       |
|------------------------|-----------------------|
| (1) X,Y+1,Z            | (2) -X+1,Y+1/2,-Z+2   |
| (3) X+1,Y,Z            | (4) X-1,Y,Z           |
| (5) -X+1,Y+1/2,-Z+1    | (6) -X+2,Y+1/2,-Z+1   |
| (7) X+1,Y+1,Z          | (8) -X+1,Y+1/2-1,-Z+1 |
| (9) -X+2,Y+1/2-1,-Z+1  | (10) X,Y-1,Z          |
| (11) -X+1,Y+1/2-1,-Z+2 | (12) X-1,Y-1,Z        |

Table 14. Intermolecular contacts less than 3.60 Å involving hydrogens

| atom | atom               | distance | atom | atom               | distance |
|------|--------------------|----------|------|--------------------|----------|
| Cl1  | H16 <sup>1</sup>   | 2.1(2)   | Cl1  | H17A <sup>2</sup>  | 2.31(15) |
| Cl1  | H17B               | 3.55(19) | Cl1  | H17B <sup>3</sup>  | 2.25(18) |
| Cl1  | H17C               | 2.41(18) | Cl1  | H3 <sup>3</sup>    | 3.264    |
| Cl1  | H13B <sup>3</sup>  | 2.948    | Cl1  | H14 <sup>2</sup>   | 3.060    |
| F8   | H5 <sup>1</sup>    | 2.771    | F8   | H6 <sup>1</sup>    | 2.460    |
| F8   | H9 <sup>4</sup>    | 2.441    | F9   | H5 <sup>5</sup>    | 2.966    |
| F9   | H6 <sup>1</sup>    | 2.708    | F9   | H6 <sup>5</sup>    | 3.591    |
| F9   | H7 <sup>1</sup>    | 3.440    | F9   | H12 <sup>1</sup>   | 3.093    |
| F11  | H10A <sup>6</sup>  | 2.544    | F11  | H10B <sup>7</sup>  | 2.413    |
| F11  | H12 <sup>8</sup>   | 3.250    | F12  | H9 <sup>4</sup>    | 2.530    |
| F12  | H10A <sup>4</sup>  | 2.918    | F12  | H10A <sup>7</sup>  | 3.351    |
| F12  | H10B <sup>7</sup>  | 3.147    | F12  | H11 <sup>4</sup>   | 2.296    |
| O15  | H17A <sup>9</sup>  | 2.61(18) | O15  | H17B <sup>9</sup>  | 3.11(19) |
| O15  | H17C <sup>9</sup>  | 3.1(2)   | O15  | H13A <sup>3</sup>  | 3.369    |
| O15  | H13B <sup>3</sup>  | 3.098    | O15  | H14 <sup>3</sup>   | 2.403    |
| O16  | H17A <sup>9</sup>  | 3.27(15) | O16  | H17B <sup>10</sup> | 3.46(17) |
| O16  | H17C <sup>10</sup> | 3.5(2)   | O16  | H2 <sup>10</sup>   | 3.002    |
| O16  | H3 <sup>10</sup>   | 2.752    | H16  | Cl1 <sup>10</sup>  | 2.1(2)   |
| H16  | N17 <sup>10</sup>  | 3.6(2)   | H16  | H17A <sup>9</sup>  | 2.8(3)   |
| H16  | H17B <sup>10</sup> | 3.2(3)   | H16  | H17C <sup>10</sup> | 2.9(3)   |
| H16  | C2 <sup>10</sup>   | 3.1(2)   | H16  | C3 <sup>10</sup>   | 3.0(2)   |
| H16  | H2 <sup>10</sup>   | 2.767    | H16  | H3 <sup>10</sup>   | 2.626    |

|      |                   |          |      |                   |          |
|------|-------------------|----------|------|-------------------|----------|
| N17  | H16 <sup>1</sup>  | 3.6(2)   | N17  | H14 <sup>11</sup> | 3.560    |
| H17A | Cl1 <sup>9</sup>  | 2.31(15) | H17A | O15 <sup>2</sup>  | 2.61(18) |
| H17A | O16 <sup>2</sup>  | 3.27(15) | H17A | H16 <sup>2</sup>  | 2.8(3)   |
| H17A | C15 <sup>2</sup>  | 3.13(18) | H17A | H14 <sup>11</sup> | 3.238    |
| H17B | Cl1 <sup>4</sup>  | 2.25(18) | H17B | Cl1               | 3.55(19) |
| H17B | O15 <sup>2</sup>  | 3.11(19) | H17B | O16 <sup>1</sup>  | 3.46(17) |
| H17B | H16 <sup>1</sup>  | 3.2(3)   | H17B | H14 <sup>11</sup> | 3.182    |
| H17C | Cl1               | 2.41(18) | H17C | O15 <sup>2</sup>  | 3.1(2)   |
| H17C | O16 <sup>1</sup>  | 3.5(2)   | H17C | H16 <sup>1</sup>  | 2.9(3)   |
| H17C | C15 <sup>2</sup>  | 3.6(2)   | H17C | H13B <sup>3</sup> | 3.539    |
| C1   | H7 <sup>4</sup>   | 3.535    | C1   | H9 <sup>4</sup>   | 3.360    |
| C1   | H13B <sup>3</sup> | 3.316    | C2   | H16 <sup>1</sup>  | 3.1(2)   |
| C2   | H5 <sup>1</sup>   | 3.447    | C2   | H7 <sup>4</sup>   | 3.183    |
| C2   | H8 <sup>4</sup>   | 3.425    | C2   | H9 <sup>4</sup>   | 3.015    |
| C2   | H13B <sup>3</sup> | 3.584    | C3   | H16 <sup>1</sup>  | 3.0(2)   |



Table 14. Intermolecular contacts less than 3.60 Å involving hydrogens (continued)

| atom | atom              | distance | atom | atom              | distance |
|------|-------------------|----------|------|-------------------|----------|
| C3   | H7 <sup>4</sup>   | 2.907    | C3   | H8 <sup>4</sup>   | 3.226    |
| C4   | H7 <sup>4</sup>   | 3.130    | C5   | H2 <sup>10</sup>  | 3.462    |
| C5   | H7 <sup>4</sup>   | 3.491    | C5   | H13A <sup>3</sup> | 3.529    |
| C5   | H13B <sup>3</sup> | 3.375    | C6   | H13A <sup>3</sup> | 3.376    |
| C6   | H13B <sup>3</sup> | 3.203    | C8   | H6 <sup>1</sup>   | 3.276    |
| C8   | H9 <sup>4</sup>   | 3.511    | C9   | H5 <sup>5</sup>   | 3.587    |
| C9   | H6 <sup>1</sup>   | 3.544    | C10  | H11 <sup>12</sup> | 3.457    |
| C11  | H10A <sup>6</sup> | 3.055    | C11  | H10B <sup>7</sup> | 3.474    |
| C12  | H10B <sup>7</sup> | 3.475    | C12  | H11 <sup>4</sup>  | 3.524    |
| C15  | H17A <sup>9</sup> | 3.13(18) | C15  | H17C <sup>9</sup> | 3.6(2)   |
| C15  | H14 <sup>3</sup>  | 3.448    | H2   | O16 <sup>1</sup>  | 3.002    |
| H2   | H16 <sup>1</sup>  | 2.767    | H2   | C5 <sup>1</sup>   | 3.462    |
| H2   | H5 <sup>1</sup>   | 2.551    | H2   | H8 <sup>4</sup>   | 3.298    |
| H2   | H9 <sup>4</sup>   | 2.851    | H3   | Cl1 <sup>4</sup>  | 3.264    |
| H3   | O16 <sup>1</sup>  | 2.752    | H3   | H16 <sup>1</sup>  | 2.626    |
| H3   | H7 <sup>4</sup>   | 3.160    | H3   | H8 <sup>4</sup>   | 2.876    |
| H5   | F8 <sup>10</sup>  | 2.771    | H5   | F9 <sup>13</sup>  | 2.966    |
| H5   | C2 <sup>10</sup>  | 3.447    | H5   | C9 <sup>13</sup>  | 3.587    |
| H5   | H2 <sup>10</sup>  | 2.551    | H5   | H8 <sup>13</sup>  | 3.326    |
| H5   | H8 <sup>10</sup>  | 3.499    | H5   | H9 <sup>13</sup>  | 3.307    |
| H5   | H13A <sup>3</sup> | 3.557    | H6   | F8 <sup>10</sup>  | 2.460    |
| H6   | F9 <sup>13</sup>  | 3.591    | H6   | F9 <sup>10</sup>  | 2.708    |

|      |                   |       |      |                   |       |
|------|-------------------|-------|------|-------------------|-------|
| H6   | C8 <sup>10</sup>  | 3.276 | H6   | C9 <sup>10</sup>  | 3.544 |
| H6   | H8 <sup>10</sup>  | 3.277 | H6   | H13A <sup>3</sup> | 3.328 |
| H6   | H13B <sup>3</sup> | 3.541 | H7   | F9 <sup>10</sup>  | 3.440 |
| H7   | C1 <sup>3</sup>   | 3.535 | H7   | C2 <sup>3</sup>   | 3.183 |
| H7   | C3 <sup>3</sup>   | 2.907 | H7   | C4 <sup>3</sup>   | 3.130 |
| H7   | C5 <sup>3</sup>   | 3.491 | H7   | H3 <sup>3</sup>   | 3.160 |
| H8   | C2 <sup>3</sup>   | 3.425 | H8   | C3 <sup>3</sup>   | 3.226 |
| H8   | H2 <sup>3</sup>   | 3.298 | H8   | H3 <sup>3</sup>   | 2.876 |
| H8   | H5 <sup>1</sup>   | 3.499 | H8   | H5 <sup>5</sup>   | 3.326 |
| H8   | H6 <sup>1</sup>   | 3.277 | H8   | H13A <sup>5</sup> | 3.064 |
| H9   | F8 <sup>3</sup>   | 2.441 | H9   | F12 <sup>3</sup>  | 2.530 |
| H9   | C1 <sup>3</sup>   | 3.360 | H9   | C2 <sup>3</sup>   | 3.015 |
| H9   | C8 <sup>3</sup>   | 3.511 | H9   | H2 <sup>3</sup>   | 2.851 |
| H9   | H5 <sup>5</sup>   | 3.307 | H10A | F11 <sup>12</sup> | 2.544 |
| H10A | F12 <sup>3</sup>  | 2.918 | H10A | F12 <sup>8</sup>  | 3.351 |

Table 14. Intermolecular contacts less than 3.60 Å involving hydrogens (continued)

| atom | atom               | distance | atom | atom               | distance |
|------|--------------------|----------|------|--------------------|----------|
| H10A | C11 <sup>12</sup>  | 3.055    | H10A | H11 <sup>12</sup>  | 2.582    |
| H10B | F11 <sup>8</sup>   | 2.413    | H10B | F12 <sup>8</sup>   | 3.147    |
| H10B | C11 <sup>8</sup>   | 3.474    | H10B | C12 <sup>8</sup>   | 3.475    |
| H10B | H11 <sup>12</sup>  | 3.508    | H10B | H12 <sup>8</sup>   | 3.219    |
| H11  | F12 <sup>3</sup>   | 2.296    | H11  | C10 <sup>6</sup>   | 3.457    |
| H11  | C12 <sup>3</sup>   | 3.524    | H11  | H10A <sup>6</sup>  | 2.582    |
| H11  | H10B <sup>6</sup>  | 3.508    | H12  | F9 <sup>10</sup>   | 3.093    |
| H12  | F11 <sup>7</sup>   | 3.250    | H12  | H10B <sup>7</sup>  | 3.219    |
| H13A | O15 <sup>4</sup>   | 3.369    | H13A | C5 <sup>4</sup>    | 3.529    |
| H13A | C6 <sup>4</sup>    | 3.376    | H13A | H5 <sup>4</sup>    | 3.557    |
| H13A | H6 <sup>4</sup>    | 3.328    | H13A | H8 <sup>13</sup>   | 3.064    |
| H13B | Cl1 <sup>4</sup>   | 2.948    | H13B | O15 <sup>4</sup>   | 3.098    |
| H13B | H17C <sup>4</sup>  | 3.539    | H13B | C1 <sup>4</sup>    | 3.316    |
| H13B | C2 <sup>4</sup>    | 3.584    | H13B | C5 <sup>4</sup>    | 3.375    |
| H13B | C6 <sup>4</sup>    | 3.203    | H13B | H6 <sup>4</sup>    | 3.541    |
| H14  | Cl1 <sup>9</sup>   | 3.060    | H14  | O15 <sup>4</sup>   | 2.403    |
| H14  | N17 <sup>14</sup>  | 3.560    | H14  | H17A <sup>14</sup> | 3.238    |
| H14  | H17B <sup>14</sup> | 3.182    | H14  | C15 <sup>4</sup>   | 3.448    |

Symmetry Operators:

(1) X,Y+1,Z

(3) X+1,Y,Z

(5) X+1,Y+1,Z

(2) -X+1,Y+1/2,-Z+2

(4) X-1,Y,Z

(6) -X+2,Y+1/2-1,-Z+1

- (7)  $-X+1, Y+1/2-1, -Z+1$
- (9)  $-X+1, Y+1/2-1, -Z+2$
- (11)  $-X, Y+1/2, -Z+2$
- (13)  $X-1, Y-1, Z$

- (8)  $-X+1, Y+1/2, -Z+1$
- (10)  $X, Y-1, Z$
- (12)  $-X+2, Y+1/2, -Z+1$
- (14)  $-X, Y+1/2-1, -Z+2$
